# Supplementary material for: Protocol for developing a mental imagery intervention: a randomised controlled trial testing a novel implementation imagery e-health intervention to change driver behaviour during floods
Source: PubMed Central journal article supplement — BMJ Open. 2019 Feb 9;9(2):e025565. doi: 10.1136/bmjopen-2018-025565 (PMC6398747; doi:10.1136/bmjopen-2018-025565), 2019-02-09
Supplement: bmjopen-2018-025565.draft_revisions.pdf [file bmjopen-2018-025565.draft_revisions.pdf]

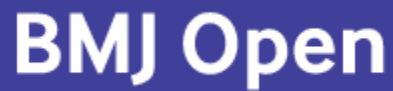

BMJ Open is committed to open peer review. As part of this commitment we make the peer review history of every article we publish publicly available.

When an article is published we post the peer reviewers' comments and the authors' responses online. We also post the versions of the paper that were used during peer review. These are the versions that the peer review comments apply to.

The versions of the paper that follow are the versions that were submitted during the peer review process. They are not the versions of record or the final published versions. They should not be cited or distributed as the published version of this manuscript.

BMJ Open is an open access journal and the full, final, typeset and author-corrected version of record of the manuscript is available on our site with no access controls, subscription charges or pay-per-view fees (<http://bmjopen.bmj.com>).

If you have any questions on BMJ Open's open peer review process please email [info.bmjopen@bmj.com](mailto:info.bmjopen@bmj.com)

# BMJ Open

## Testing a novel implementation imagery e-health intervention to change driver behaviour during floods: A randomised controlled trial protocol

|                               |                                                                                                                                                                                                                                                                                                                                                                                                                                                    |
|-------------------------------|----------------------------------------------------------------------------------------------------------------------------------------------------------------------------------------------------------------------------------------------------------------------------------------------------------------------------------------------------------------------------------------------------------------------------------------------------|
| Journal:                      | <i>BMJ Open</i>                                                                                                                                                                                                                                                                                                                                                                                                                                    |
| Manuscript ID                 | bmjopen-2018-025565                                                                                                                                                                                                                                                                                                                                                                                                                                |
| Article Type:                 | Protocol                                                                                                                                                                                                                                                                                                                                                                                                                                           |
| Date Submitted by the Author: | 23-Jul-2018                                                                                                                                                                                                                                                                                                                                                                                                                                        |
| Complete List of Authors:     | Hamilton, Kyra; Griffith University, School of Applied Psychology<br>Keech, Jacob; Griffith University, School of Applied Psychology<br>Peden, Amy; Royal Life Saving Society Australia, Research and Policy Department; James Cook University Division of Tropical Health and Medicine, College of Public Health, Medical and Veterinary Sciences<br>Hagger, Martin; Curtin University, Health Psychology and Behavioural Medicine Research Group |
| Keywords:                     | Flooded waterways, Social-cognitive theories, Driving, Drowning, Water safety, Mental imagery                                                                                                                                                                                                                                                                                                                                                      |
|                               |                                                                                                                                                                                                                                                                                                                                                                                                                                                    |

SCHOLARONE™  
Manuscripts

**Testing a novel implementation imagery e-health intervention to change driver behaviour  
during floods: A randomised controlled trial protocol**

Kyra Hamilton<sup>1,2\*</sup>, Jacob J. Keech<sup>1</sup>, Amy E. Peden<sup>3,4</sup> & Martin S. Hagger<sup>2,5</sup>

<sup>1</sup>School of Applied Psychology, Griffith University, Brisbane, Australia

<sup>2</sup>School of Psychology, Health Psychology and Behavioural Medicine Research Group, Curtin  
University, Perth, Western Australia, Australia.

<sup>3</sup>Royal Life Saving Society – Australia, Broadway, New South Wales, Australia

<sup>4</sup>College of Public Health, Medical and Veterinary Sciences, James Cook University,  
Townsville, Queensland, Australia

<sup>5</sup>Faculty of Sport and Health Sciences, University of Jyväskylä, Jyväskylä, Finland

\*For correspondence contact: Dr. Kyra Hamilton, Health and Psychology Innovations (HaPI)  
Research Lab, School of Applied Psychology, Griffith University, 176 Messines Ridge Road,  
Mt Gravatt, QLD 4122. Email: [kyra.hamilton@griffith.edu.au](mailto:kyra.hamilton@griffith.edu.au); Ph: +61 7 373 53334

Journal: BMJ Open

Type of Contribution: Research protocol

## Abstract

**Introduction:** Drowning due to driving into floodwater accounts for a significant proportion of all deaths by drowning. Despite awareness campaigns such as ‘If it’s flooded, forget it’, people continue to drive into floodwater. This causes loss of life, risk to rescuers, and damage to vehicles. The aim of this study was to develop and evaluate an online e-health intervention to promote safe driving behaviour during flood events.

**Methods and analysis:** The study is conducted in two phases. Phase I involves the development and optimisation of the intervention content through expert review and pilot testing. Phase II is a 2x3 randomised controlled trial in which participants are randomised into one of two conditions: (1) education about the risks of driving into floodwater; or, (2) education about the risks of driving into floodwater plus a theory-based behaviour change intervention using planning and imagery exercises.

**Ethics and dissemination:** The study has been approved by the Griffith University Human Research Ethics Committee. Participants will review a study information sheet and provide informed consent prior to commencing participation. Results will be disseminated through peer-reviewed publications, industry reports, media releases, and at academic conferences. Deidentified data will be made publicly available following publication of the results.

**Trial Registration:** ACTRN12618001212246

Available at: <http://www.ANZCTR.org.au/ACTRN12618001212246.aspx>

**Keywords:** Flooded waterways; social cognitive theories; driving; drowning, water safety; mental imagery

### Article Summary

- The study intervention is theory-based, consisting of a novel integration of effective behaviour change strategies.
- The study will use a sample with key demographic characteristics proportional to the Australian population, ensuring that the results are generalisable.
- While the outcomes are an extensive range of psychological variables established to predict driving into floodwater, the unpredictable occurrence of flood events means that examining the effect of our intervention on actual behaviour is not feasible within the timeframe of the study.

Introduction

Drowning is the third leading cause of injury-related deaths worldwide <sup>1</sup> and the leading cause of death during times of flood <sup>2,3</sup>. Activities such as driving into, walking near, or engaging in recreational activities near or in floodwater are commonly reported as preceding drowning <sup>1</sup>. Reports have shown that, in Australia, around 53% of flood-related deaths and 55% of all river flood-related unintentional fatal deaths <sup>4</sup> were the result of driving into floodwaters. Another recent study surveyed a more than 600 Australian river users and found 35.7% of participants reported having driven into floodwater, with males (43.9%) significantly more likely to have driven into floodwaters than females (27.8%) <sup>5</sup>. These drowning statistics also likely underestimate the true extent of the driving-related drownings due to limitations around the use of International Classification of Diseases (ICD) flood-related drowning codes <sup>6</sup> <sup>7</sup>.

Due to the magnitude of this issue, intentionally driving into floodwater has been the subject of mass-media drowning prevention campaigns such as ‘Turn Around Don’t Drown’ <sup>8</sup> in the United States and ‘If it’s flooded, forget it’ <sup>9</sup> in Australia. However, very little research to date has evaluated the effect of these campaigns on attitudes, motivation, and actual drowning rates. In fact, fatal and non-fatal drownings resulting from intentionally driving into floodwater continue to occur regularly <sup>10-12</sup>. For example, during a severe weather event in a 24-hour period, in March 2017, 108 floodwater rescues were conducted in Queensland, Australia by the State Emergency Service <sup>13</sup>. This has in resulted in a national call for research into behaviours around floodwater <sup>12</sup>.

In response to a paucity of empirical research, we conducted a series of studies to understand the psychological processes underpinning decisions around driving into floodwater <sup>14-16</sup>, avoiding driving into floodwater <sup>17</sup>, and the experiences of those who rescue drivers who have driven into floodwater <sup>18</sup>. While it is commonly assumed that people choose to drive into floodwater due to a lack of awareness of the risks, our research identified that many of the

people who drive into floodwater are aware of the risks and have been exposed to relevant mass-media campaigns<sup>14</sup>.

Building on this research, we developed and evaluated a mass-media style infographic video that included theory-based behaviour change methods to bridge the gap between awareness and intentions to drive into floodwater<sup>19</sup>. While the video had an effect on attitudes, subjective norm, perceived susceptibility, and perceived severity immediately post-intervention, these effects were only maintained at the four-week follow up for women and not men. Further, there was no effect of the video on intentions<sup>19</sup>. Therefore, continued development and evaluation of interventions aimed at promoting safe driving behaviour during floods is a priority. Some potential explanations for the null effect of the infographic on intentions are that the intervention did not directly target intentions and/or did not aid in the development of a plan that can be implemented if this particular situation arises for the person during a flood event (i.e. faced with a flooded road whilst in their vehicle). We also suspect that gender differences in the effects at follow-up may have been due to females self-reinforcing the messages contained within the intervention due to a greater tendency to utilise ruminative thinking styles<sup>20</sup>. This suggests that an effective intervention aimed at promoting safe driving behaviour during floods should utilise behaviour change methods that aid in the development of a plan and when to implement it, such as implementation intentions<sup>21</sup>; and, allow sufficient internalisation of the intervention content through strategies such as mental imagery<sup>22</sup>.

Implementation intentions are concrete plans about when, where, and how to enact a behaviour to achieve a specific goal which contrasts from simply intending to achieve a goal—otherwise known as goal intentions<sup>23</sup>. Implementation intentions have been found to be superior to goal intentions in achieving goals, with a meta-analysis finding medium to large effects of implementation intentions on goal achievement<sup>24</sup>. Conroy and Hagger<sup>22</sup> describe mental imagery interventions as involving “self-directed imagining or visualizing specific

events, actions, or outcomes, including concomitant feelings and responses, with the express purpose of increasing motivation toward a target action or task” (p. 669). Conroy and Hagger’s (2018) meta-analysis of imagery interventions in health behaviour found nontrivial small averaged corrected effects of these interventions on post-intervention behaviours, intentions, perceived control, and attitudes; and, identified characteristics of interventions that moderate the effect size. A small number of studies have combined implementation intentions and mental imagery to change health behaviours such as fruit and vegetable consumption<sup>25</sup> and alcohol intake<sup>26</sup> yielding small to medium effect sizes. In building upon our prior work<sup>19</sup>, we therefore seek to combine two behaviour change strategies—mental imagery and implementation intentions—to develop an *implementation imagery* intervention to promote less favourable intentions to drive into floodwater.

**Objectives**

Drawing on our previous research<sup>14-19</sup> we aim to develop a theory-based behavioural intervention to promote less favourable intentions of drivers to drive into floodwaters. The research will be conducted in two phases, a development phase in which the theory-based content of the implementation imagery intervention embedded in a survey will be developed and piloted, and an implementation and evaluation phase in which the effect of the intervention in changing intentions and beliefs with respect to driving into floodwaters, will be tested in a population of drivers using a randomised controlled design. Drivers recruited to the trial are randomly assigned to intervention or control conditions. Participants assigned to the implementation imagery condition receive a set of education-based messages that focus on changing attitudes and intentions with respect to driving into floodwaters, and the theory-based implementation imagery exercises. The control condition comprises the education-based messages alone. Specifically, the objectives of the current study are to: (a) test the effectiveness of the intervention administered after baseline measures of study constructs at Time 1 (T1) in changing drivers’ intentions and beliefs immediately post-intervention at Time 2 (T2); (b)

determine whether the effects of the intervention are maintained four weeks later at Time 3 (T3); compare the effects of the intervention to effects of a comparison condition comprising publicly available education on driving into floodwater; and, (d) examine gender differences in intervention effects at T2 and T3.

We hypothesise that drivers assigned to the intervention condition will report significantly lower intentions to drive through floodwater, relative to the control condition immediately post-intervention at T2 (primary outcome; Hypothesis 1). With regard to the secondary outcomes, we hypothesise that drivers assigned to the intervention condition will report significantly less favourable attitudes and reduced perceived social pressure to drive through floodwater, as well as greater perceptions of behavioural control, risk perception, perceived susceptibility, perceived severity, and anticipated regret toward driving through floodwater, relative to the control condition immediately post-intervention at T2 (Hypothesis 2). We further hypothesise that that drivers assigned to the intervention condition will report significantly greater barrier self-efficacy and action planning regarding avoiding driving through floodwater, relative to the control condition immediately post-intervention at T2 (Hypothesis 3). We also expect that the effects of the intervention will be maintained four-weeks later at T3 (Hypothesis 4). Given our previous research has identified gender differences in changing beliefs<sup>19</sup>, we will also test for sex differences in the effects of the intervention on study outcomes.

## Methods and Analysis

The study protocol is reported in accordance with SPIRIT Statement standard protocol items for clinical trials<sup>27 28</sup>.

### Intervention Development and Optimisation

The intervention content was developed based on existing safety messages<sup>9</sup>, our prior research<sup>14 17</sup>, behaviour change methods<sup>29</sup>, and best-practice techniques for implementation intentions and mental imagery<sup>22</sup>. Prior to recording, the scripts were reviewed by a panel of

experts in drowning prevention, behaviour change, and media and communication. The scripts were also piloted with two Australian drivers and feedback was invited. Based on initial expert and driver feedback, refinements to wording of the scripts were made. The scripts were then audio-recorded using a voiceover actor and developed into videos. The videos then underwent further expert review and piloting with eight drivers from the target population. The pilot involved the participants completing the T1 survey, the intervention, the T2 survey, and then a semi-structured interview where they were asked broadly about their thoughts regarding the exercises. The participants were probed for specific information regarding clarity and timing of the different exercises in the video if it was not already shared. The drivers were purposively recruited to ensure a range on key demographic factors of age, sex, and education level. Based on qualitative feedback provided by pilot participants, we made data-driven refinements to the presentation and timing allocated to the exercises.

**Patient and Public Involvement**

Patient and public involvement in the development of the intervention was conducted through our prior research which involved qualitative interviews with members of the target population<sup>14 17</sup>—Australian drivers—and through piloting of the intervention materials with Australian drivers. Specifically, drivers’ descriptions of the behaviour informed the wording of the items used in the outcome measures. Drivers’ descriptions from these studies also informed the content of the intervention. The research questions were developed around evaluating the effect of the intervention on psychological constructs that have been found to predict willingness to drive through floodwater in prior research<sup>15 16</sup>. Drivers will not be involved in the recruitment or conduct of the study. Participants will be provided with the contact details of the research team on the study information sheet and will be informed that they can contact the research team if they wish to receive the results of the study. The burden of participating will be assessed by the drivers after having read the study information and prior to provision of informed consent.

## Study Design

The intervention will be evaluated against the control condition immediately post-intervention (T2) and four-weeks later (T3). The evaluation will adopt a 2 (intervention condition: education and implementation intention imagery condition vs. education only condition) x 3 (time: T1, T2, T3) parallel group randomised controlled design. Figure 1 illustrates the design of the intervention and participant flow through the study.

INSERT FIGURE 1 ABOUT HERE

## Setting and Participant Recruitment

The randomised controlled trial will be conducted using an online survey tool (Qualtrics<sup>TM</sup>). Participants will be eligible if they hold a valid full driver's licence and are an Australian resident. Participants will be recruited using a research panel provider and screened by the provider before entering the trial. In addition to the inclusion criteria, participants will be screened on the following demographic characteristics and quotas will be imposed to ensure that the sample comprises similar proportions of these characteristics as the general population: age, sex, geographic region (by state and metropolitan vs. rural), and household income. The study will adopt a double-blind procedure. Participants will be unaware of the condition to which they have been assigned and study purpose. Staff at the research panel company who may have direct contact with the participants will also be unaware of the conditions and purpose of the study.

## Data Quality

Four questions will be embedded within the T1 survey to assess attentive responding<sup>30</sup>  
<sup>31</sup>. The questions instruct the choice of a particular answer so that it is not possible to answer the question incorrectly if the item is read carefully (e.g., "please choose answer Choice 2 to ensure you are paying attention"). Participants who do not answer all four of the items correctly will be excluded prior to randomisation.

**Randomisation**

Randomisation into one of the two groups will be conducted by the Qualtrics randomizer feature following the T1 survey. The Qualtrics randomizer operates using a Mersenne Twister pseudorandom number generator. The Mersenne Twister is the default pseudorandom number generator for a range of widely used software packages including Microsoft Excel and SPSS. By nature of this method of random assignment, the sequence cannot be determined until the participant is assigned.

**Intervention Condition**

Participants will be initially presented with a brief information sheet outlining study expectations and participant rights prior to completing an informed consent form. They will then watch a brief ‘welcome’ video to familiarise participants with the voice of the narrator, and to give participants the opportunity to enable the audio on their device prior to commencing the intervention. Next, participants will complete the T1 (pre-intervention) questionnaire, after which they will be randomised into one of two conditions (see Figure 1 for trial design). Both groups will watch the welcome video; however, the welcome video for the control group does not make reference the mental imagery activity. The intervention group will receive the following six-part procedure, while the control group will receive only Part 1. Participants are then directed to the T2 survey. See Supplementary Material A for video scripts. The intervention utilises a range of behaviour change methods<sup>29</sup>, which have been mapped on to theoretical constructs that comprise the study outcomes (see Table 1).

**Part 1: Education.** The first video is designed to educate participants on the risks of driving into floodwater. It has been composed based on information that is publicly available and commonly broadcasted in Australia.

**Part 2: Promoting willingness to form a goal.** The second video is designed to encourage participants to form a goal to avoid driving into floodwater if they encounter it on their route. The video contains visuals of rain, floodwater, and a floodwater damaged road, and

drivers are provided with further information about why people driver into floodwater drawn from our prior research<sup>14 17</sup>.

**Part 3: Practice imagery exercise.** Prior to the process imagery exercise, participants are provided with a practice guided imagery exercise. The purpose of the exercise is to allow participants to familiarise them with the practice of imagery, and to get them to relax and begin visualising vivid images. The practice guided imagery exercise prompts participants to imaging cutting into a lemon with a knife. The exercise uses a familiar situation in order to facilitate imagery.

**Part 4: Process imagery exercise.** Following the practice exercise, participants are provided with some examples of safe options to take should they encounter floodwater on their route. Participants are then instructed to imagine approaching floodwaters while driving their car and selecting one of the options, and then instructed to visualise these scenes independently for approximately two minutes. After the exercise is complete, the narrator advises the participant that the activity is over and requests that they note down the things they imagined in a response box alongside the video.

**Part 5: Outcome imagery exercise.** Participants watch a video which guides them through an outcome imagery exercise. This involves imagining the outcomes that may occur if they drive into floodwater, followed by a range of outcomes that would occur if they do not drive into floodwater. After the exercise is complete, the narrator advises the participant that the activity is over and requests that they note down the things they imagined in the space below the video.

**Part 6: Conclusion.** Following the final imagery exercise, participants watch a video thanking them for their attention and reminding them that if they are ever in the imagined situation, to remember their goal. The purpose of this is to create a cue that may be triggered by a situation similar to that imagined during the intervention.

**Imagery Fidelity.** Fidelity of the imagery intervention was assessed using four items modified from Knäuper, et al.<sup>25</sup>. The items assess vividness, clarity, detail, and ease of imagery on 7-point scales (e.g., “How CLEAR was the mental image that you had of yourself avoiding driving through the floodwater?”). The 7-point scales vary for each item and are described in Supplementary Material B.

**Control Condition**

Participants in the control group will receive the Part 1: Education video and will then then be directed to the T2 survey. This active control condition was chosen as the comparator to allow the effect of the imagery intervention to be examined above and beyond the effect of simply providing information about the behaviour.

**Outcomes**

**Psychological measures.** Participants will complete measures of psychological constructs from two social-cognitive theories: the theory of planned behaviour<sup>32</sup> and the health action process approach<sup>33</sup>. These theories were selected because they have used to identify the psychological determinants of a range of health and safety behaviours<sup>34 35</sup>. The psychological constructs will be measured on multi-item psychometric instruments developed using standardised guidelines (e.g., Ajzen, 2006<sup>36</sup>)<sup>a</sup>. While we discuss the behaviour in this study as “driving into floodwater” because by nature there is no certainty around a driver making it through, we measure the behaviour using the wording “driving through floodwater”. This is based on our prior qualitative work where participants most commonly described the behaviour in this way<sup>14 17</sup>. The self-report psychological measures will be administered at T1, T2 and T3. See Supplementary Material B for all measures used in the study.

**Intention.** Intention to drive through floodwater will be measured using four items (e.g., “I intend to drive through the floodwater”). Responses are provided on 7-point scales (1 =

<sup>a</sup> All scales measuring social-cognitive constructs except action planning and perceived behavioural control have been used in our previous study<sup>19</sup>, exhibiting good internal consistency.

1  
2  
3 *strongly disagree* and 7 = *strongly agree*). Change in intention is the primary outcome in the  
4  
5 study. The following outcomes are secondary outcomes.

6  
7 **Attitudes.** Attitudes towards driving through floodwater will be assessed using five  
8  
9 items preceded by the common stem: “If I were to drive through the floodwater, it would be”  
10  
11 Responses will be provided on semantic differential scales (e.g., 1 = *bad* and 7 = *good*).  
12

13  
14 **Subjective norm.** Subjective norm will be measured using five items prompting  
15  
16 participants to rate the extent to which important others would want them to drive through  
17  
18 floodwater and whether people similar to them would drive through (e.g., “Most people who  
19  
20 are important to me would approve of me driving through the floodwater”). Responses are  
21  
22 provided on 7-point scales (1 = *strongly disagree* and 7 = *strongly agree*).  
23

24  
25 **Perceived behavioural control.** Perceived behavioural control will be measured using  
26  
27 three items assessing drivers’ perceptions of their ability to control the behaviour (e.g., “I have  
28  
29 complete control over whether I drive through the floodwater”). Responses are provided on 7-  
30  
31 point scales (1 = *strongly disagree* and 7 = *strongly agree*).  
32

33  
34 **Risk perception.** Risk perception will be measured using a two-item scale (e.g., “It  
35  
36 would be risky for me to drive through the floodwater”). Responses are provided on 7-point  
37  
38 scales (1 = *strongly disagree* and 7 = *strongly agree*).  
39

40  
41 **Perceived susceptibility.** Perceived susceptibility will be measured using a three-item  
42  
43 scale (e.g., “My chances of having trouble if I drive through the floodwater are great”).  
44  
45 Responses are provided on 7-point scales (1 = *extremely unsusceptible* and 7 = *extremely*  
46  
47 *susceptible*).  
48

49  
50 **Perceived severity.** Perceived severity will be measured using a two-item scale (e.g., “If  
51  
52 I drive through the floodwater, the consequences would be...”). Responses are provided on 7-  
53  
54 point scales (1 = *not at all severe* and 7 = *extremely severe*).  
55  
56  
57  
58  
59  
60

**Anticipated regret.** Anticipated regret will be measured using a three-item scale (e.g., “If I were to drive through the floodwater, I would feel regret”). Responses are provided on 7-point scales (1 = *strongly disagree* and 7 = *strongly agree*).

**Barrier self-efficacy.** Barrier self-efficacy will be measured using nine items assessing drivers’ confidence to avoid driving through floodwater (e.g., “I am confident I can avoid driving through floodwaters in the future... even when the alternative route will take more time/is inconvenient”). Responses are provided on 7-point scales (1 = *strongly disagree* and 7 = *strongly agree*). The barrier self-efficacy items were developed using belief elicitation in our prior work <sup>17</sup> with a sample of drivers who had avoided driving into floodwater when they encountered it on their route.

**Action planning.** Action planning will be measured on a four-item scale (e.g., “I have made a plan regarding... How to avoid driving through floodwater”). Responses are provided on 7-point scales (1 = *not at all true* and 7 = *exactly true*).

**Covariates.** Consistent with the approach taken in our prior work <sup>19</sup>, a number of demographic variables will be measured and used as covariates in the analyses. Willingness to form a goal to avoid driving through floodwater and imagery ability will also be measured and used as covariates.

**Demographic and other background factors.** Demographic and background details are collected at T1 including: (i) gender (0 = *male* and 1 = *female*); (ii) age (in years); (iii) relationship status (0 = *not married* and 1 = *married*); (iv) education level (0 = *non-university* and 1 = *university*); (v) number of years driving; (vi) number of children; and (vii) past frequency of driving through floodwater measured using a single item: “How often in the past 5 years have you driven through floodwater? ‘Floodwater’ refers to a body of water covering land that is normally dry”, with responses provided on a 7-point scale (1 = *never* and 7 = *very often*).

**Willingness to form a goal to avoid driving through floodwater.** Following Parts 1 and 2 of the intervention (or Part 1 for the control group), participants will be asked a question to assess their willingness to form a goal to avoid driving into floodwater, “Now that you have heard some information about driving into floodwater, please indicate your agreement with the following statement: I am willing to form a goal to avoid driving through floodwater”, responses provided on a 7-point scale (1 = *strongly disagree* and to 7 = *strongly agree*).

**Imagery ability.** Individual differences in imagery ability will be measured using a 10-item scale drawn from the International Personality Item Pool (IPIP)<sup>37</sup> and designed to measure Factor V (Intellect and Imagination) of Goldberg’s Big-Five Factor Markers<sup>38</sup>. Responses provided on 5-point scales (1 = *very inaccurate* and 5 = *very accurate*). For example, “Typically, I... Have a vivid imagination”.

**Power analysis.** An *a priori* power analysis is conducted using G\*Power v3.1 for an ANCOVA model estimating fixed effects, main effects, and interactions. The effect size was set to  $f = .25$  (corresponding to the effect size of intention from pre- to post-intervention in Hamilton et al., 2018<sup>19</sup>) to detect a medium effect, with power set at .95 and alpha set at .01 (adjusted to protect from inflation of type I error rate due to multiple tests). Inclusion of nine covariates was also specified. The analysis yielded a total minimum required sample size of 289. We aim to recruit 460 participants at the baseline in order to meet our target sample size of 300 participants at the follow-up (allowing for up to 35% attrition). Recruitment will cease when 460 participants have participated in the baseline.

**Statistical analysis.** Hypotheses will be tested using a series of mixed-model ANCOVAs. In the analyses, condition/group will be a between-participants variable; Time (T1, T2, T3) will be a within-participants variable; and the primary outcome (intention) and secondary outcomes (attitudes, subjective norm, perceived behavioural control, risk perception, perceived susceptibility, perceived severity, anticipated regret, barrier self-efficacy, action planning) will be separate dependent variables. Consistent with the approach taken in our prior

work<sup>19</sup>, demographic variables (gender, age, relationship status, educational level, number of years driving, number of children, and past frequency of driving through floodwaters) will be included as covariates in the analyses. Mental imagery ability and willingness to form a goal to avoid driving into floodwater will also be included as covariates. Where an ANCOVA indicates that there is a significant time\*group interaction for any of the outcome variables, simple effects analyses using estimated marginal means will be conducted for that outcome. Specifically, we will compare within-group differences in the outcome between time points, and between-group differences in the outcome at each time point. Alpha will be set at .01 for all analyses (adjusted to protect from inflation of type I error rate due to multiple tests). Missing data will be imputed using the Expectation-Maximisation (E-M) algorithm.

Ethics and Dissemination

Ethical approval for the study has been granted by the Griffith University Human Research Ethics Committee (GU ref no: 2017/895). We anticipate that the rigorous development and piloting process will ensure that no amendments to the protocol are required. However, if any amendments are required, they will be submitted as amendments to the Australian New Zealand Clinical Trials Registry record and reported in the final report of the study. We do not anticipate any risks greater than daily living to be involved with participation in this project, and no discomfort or adverse effects were reported by participants in the pilot study. However, participants are provided with the following information: “should you experience any discomfort due to undertaking this survey, Lifeline (13 11 14) offers a free 24-hour telephone counselling service”.

**Informed consent.** Before being presented with the online baseline survey, participants are presented with the study information sheet. The information sheet indicates that proceeding to the next page and commencing participation will be considered consent to participate. Participants are also advised in the information sheet that they are free to cease participation at

any time without comment or penalty. See Supplementary Material C for informed consent materials.

**Confidentiality.** Participants will be recruited by a research panel provider and directed to an online Qualtrics survey to participate in the study. The research panel provider does not have access to participant responses, which are accessible only by members of the research team. The research team match responses using a code identifier, and the code identifier of those who complete the baseline are provided to the research panel provider to invite participants to complete the follow-up. The research team do not have access to the identities of participants.

**Data deposition.** Prior to publication of the results, data will be stored securely on Qualtrics and then the Griffith University Google Drive or OneDrive allocation and will be accessible only by authors K.H and J.J.K. Once data collection is complete, the data will be transferred to author M.S.H. Given the restrictions on access to the data, a data monitoring committee will not be required. Following publication, deidentified data and statistical code will be made available on Open Science Framework.

**Dissemination.** The findings are presented in the form of peer-reviewed journal articles and industry reports and presented at scientific conferences. The authors of this protocol will author publications arising from this trial. Media releases and public statements about the research are also made to disseminate the findings to the general public. The findings are also made available to participants if requested. Contact details and procedure for requesting the results are made available in the study information sheet. Trial materials are made available on Open Science Framework following publication of the results.

## Discussion

The purpose of the current project is to evaluate the effectiveness of a theory-based intervention using implementation imagery to change drivers' intentions to drive into floodwaters. The intervention will be delivered online using a survey tool containing a series of

infographic videos that present intervention messages. Participants will be randomised to an intervention condition or a control condition. The videos presented to participants assigned to the intervention condition will comprise a series of educational messages about the risks of driving into floodwater and an exercise using implementation imagery. The videos presented to participants assigned to the control condition will comprise the education messages only. The primary outcome variable will be intentions to drive into floodwater, and secondary outcomes will be theory-based constructs identified as important determinants of intentions to drive into floodwater in our previous research (provide references).

Driving into floodwaters is a high-risk behaviour that can be fatal. Reducing drownings from risky aquatic activities during floods has been identified as a priority in the Australian Water Safety Strategy 2016-2020<sup>12</sup>. Strategies that change drivers' behaviour around floodwater should be at the forefront of efforts to reduce drivers' propensity to drive into floodwaters. The present intervention examines whether a behavioural intervention will be effective in changing driver's intentions drive into floodwater. The intervention has been developed with a focus on effectiveness and potential feasibility. In terms of effectiveness, the intervention is based on psychological theories of attitudes, motivation and decision making, consistent with research indicating that effective behaviour change necessitates a fundamental understanding of behaviour, and that theory-based interventions can lead to more effective and efficient interventions. The intervention content is based on formative research identifying the determinants of risky behaviour when driving in floods and into floodwaters and is designed to target change in behaviour through change in those determinants. In terms of feasibility, the intervention has been designed to be delivered online and uses accessible infographic videos co-designed by researchers and stakeholders. The exercises contained in the videos are designed to be brief and cost-effective, reducing response burden, and maximising the likelihood of engagement. If found to be effective, translation of the intervention into practice will be facilitated by these design features. The brief, online design means it could be

1  
2 incorporated in websites and disseminated through programs such as learner driver education  
3  
4 and during media campaigns during floods with minimal requirement for modification and at  
5  
6 relatively low cost. It also paves the way for larger scale usability and feasibility trials.  
7

8  
9 The intervention will also make a contribution to theory. The current intervention  
10  
11 adopts behaviour change strategies that target key theoretical determinants demonstrated to be  
12  
13 related to risky driving behaviours around floodwater (reference our and others work). We  
14  
15 expect our test of the intervention to contribute to the evidence base of effective methods for  
16  
17 changing behaviour. Such evidence is important in order to identify the components of  
18  
19 behaviour change interventions that are effective in promoting behaviour change and  
20  
21 contributes to more effective and optimally efficient interventions.  
22  
23

24 A key strength of the study is that it uses a sample with key demographic characteristics  
25  
26 proportional to the Australian population, ensuring results are generalisable. While the  
27  
28 outcomes are an extensive range of psychological variables established to predict driving into  
29  
30 floodwater, the unpredictable and infrequent occurrence of flood events means that examining  
31  
32 the effect of our intervention on actual behaviour is not feasible within the timeframe of the  
33  
34 study. The paucity of high-quality theory-based intervention research is not unique to driving  
35  
36 into floodwater. For example, for another behaviour that carries high risk of drowning, alcohol  
37  
38 use during aquatic activities, there has not been any intervention research in more than two  
39  
40 decades<sup>39</sup>. If effective, this type of intervention and mode of delivery may be developed and  
41  
42 applied to other water safety behaviours with the potential to reduce drowning.  
43  
44  
45  
46  
47  
48  
49  
50  
51  
52  
53  
54  
55  
56  
57  
58  
59  
60

References

1. World Health Organization. Global report on drowning: Preventing a leading killer Geneva, Switzerland. 2014 [cited 2018 Apr 25]. Available from: [http://www.who.int/violence\\_injury\\_prevention/publications/drowning\\_global\\_report/Final\\_report\\_full\\_web.pdf](http://www.who.int/violence_injury_prevention/publications/drowning_global_report/Final_report_full_web.pdf).

2. Di Mauro M, De Bruijn KM, Meloni M. Quantitative methods for estimating flood fatalities: towards the introduction of loss-of-life estimation in the assessment of flood risk. *Natural Hazards* 2012;1-31. doi: 10.1007/s11069-012-0207-4

3. Jonkman S. Loss of life due to floods: General overview. In: Bierens J, ed. Drowning. Berlin, Germany: Springer 2014:957-65.

4. Peden AE, Franklin RC, Leggat P, et al. Causal pathways of flood related river drowning deaths in Australia. *PLOS Currents Disasters* 2017 doi: 10.1371/currents.dis.001072490b201118f0f689c0fbe7d437

5. Peden AE, Franklin RC, Leggat P. The flood-related behaviour of river users in Australia. *PLOS Currents Disasters* 2018;Jun 14. Edition 1 doi: 10.1371/currents.dis.89e243413a0625941387c8b9637e291b

6. Peden AE, Franklin RC, Leggat PA. Fatal river drowning: the identification of research gaps through a systematic literature review. *Inj Prev* 2016 doi: 10.1136/injuryprev-2015-041750

7. Peden AE, Franklin RC, Mahony AJ, et al. Using a retrospective cross-sectional study to analyse unintentional fatal drowning in Australia: ICD-10 coding-based methodologies verses actual deaths. *BMJ Open* 2017;7(12) doi: 10.1136/bmjopen-2017-019407

8. National Oceanic and Atmospheric Administration. Turn Around Don't Drown Silver Spring, MD. 2011 [cited 2018 Apr 25]. Available from: <http://www.nws.noaa.gov/os/water/tadd/>.

9. Queensland Floods Commission of Inquiry. Queensland floods commission of inquiry: final report. Brisbane, Australia. 2012 [cited 2018 Apr 25]. Available from: [http://www.floodcommission.qld.gov.au/\\_data/assets/pdf\\_file/0007/11698/QFCI-Final-Report-March-2012.pdf](http://www.floodcommission.qld.gov.au/_data/assets/pdf_file/0007/11698/QFCI-Final-Report-March-2012.pdf) accessed Apr 25 2018.

10. Peden AE, Franklin RC, Leggat PA. The hidden tragedy of rivers: A decade of unintentional fatal drowning in Australia. *PLoS ONE* 2016;11(8):e0160709. doi: 10.1371/journal.pone.0160709

11. Royal Life Saving Society - Australia. Royal Life Saving National Drowning Report 2016 Sydney, Australia. 2016 [cited 2018 Apr 25]. Available from: [https://www.royallifesaving.com.au/\\_data/assets/pdf\\_file/0004/18085/RLS\\_NDR2016\\_ReportLR.pdf](https://www.royallifesaving.com.au/_data/assets/pdf_file/0004/18085/RLS_NDR2016_ReportLR.pdf).

12. Australian Water Safety Council. Australian Water Safety Strategy 2016-2020. Sydney, Australia: Australian Water Safety Council, 2016.

13. Royal Automobile Club of Queensland; RACQ. More than 100 floodwater rescues: If it is flooded, forget it: Royal Automobile Club of Queensland; 2017 [cited 2018 Apr 25]. Available from: <https://live.racq.com.au/2017/03/100-floodwater-rescues-flooded-forget/> accessed July 5th 2017.

14. Hamilton K, Peden AE, Keech JJ, et al. Deciding to drive through floodwater: A qualitative analysis through the lived experience. Royal Life Saving Society – Australia & Griffith University. 2016 [cited 2018 Apr 25]. Available from: <http://doi.org/10.4225/01/5aa21363c374a>.

15. Hamilton K, Peden AE, Pearson M, et al. Stop there's water on the road! Identifying key beliefs guiding people's willingness to drive through flooded waterways. *Safety Science* 2016;89:308-14. doi: 10.1016/j.ssci.2016.07.004

16. Pearson M, Hamilton K. Investigating driver willingness to drive through flooded waterways. *Accid Anal Prev* 2014;72:382-90. doi: 10.1016/j.aap.2014.07.018
17. Hamilton K, Price S, Keech JJ, et al. Drivers' experiences during floods: Investigating the psychological influences underpinning decisions to avoid driving through floodwater. *International Journal of Disaster Risk Reduction* 2018;28:507-18. doi: 10.1016/j.ijdr.2017.12.013
18. Keech JJ, Smith SR, Peden AE, et al. The lived experience of rescuing people who have driven into floodwater: Understanding challenges and identifying areas for providing support. *Health Promot J Austr* 2018 doi: 10.1002/hpja.181
19. Hamilton K, Peden AE, Keech JJ, et al. Changing people's attitudes and beliefs toward driving through floodwaters: Evaluation of a video infographic. *Transportation Research Part F: Traffic Psychology and Behaviour* 2018;53:50-60. doi: 10.1016/j.trf.2017.12.012
20. Johnson DP, Whisman MA. Gender differences in rumination: A meta-analysis. *Personality and Individual Differences* 2013;55(4):367-74. doi: 10.1016/j.paid.2013.03.019
21. Hagger MS, Luszczynska A, de Wit J, et al. Implementation intention and planning interventions in Health Psychology: Recommendations from the Synergy Expert Group for research and practice. *Psychol Health* 2016;31(7):814-39. doi: 10.1080/08870446.2016.1146719
22. Conroy D, Hagger MS. Imagery interventions in health behavior: A meta-analysis. *Health Psychol* 2018;37(7):668-79. doi: 10.1037/hea0000625 [published Online First: 2018/05/29]
23. Gollwitzer PM. Implementation intentions: Strong effects of simple plans. *Am Psychol* 1999;54(7):493.
24. Gollwitzer PM, & Sheeran, P. Implementation intentions and goal achievement: a meta-analysis of effects and processes. *Advances in Experimental Social Psychology* 2006;38:69-119. doi: 10.1016/S0065-2601(06)38002-1
25. Knäuper B, McCollam A, Rosen-Brown A, et al. Fruitful plans: Adding targeted mental imagery to implementation intentions increases fruit consumption. *Psychol Health* 2011;26(5):601-17. doi: 10.1080/08870441003703218
26. Hagger MS, Lonsdale A, Koka A, et al. An intervention to reduce alcohol consumption in undergraduate students using implementation intentions and mental simulations: A cross-national study. *International Journal of Behavioral Medicine* 2012;19(1):82-96. doi: 10.1007/s12529-011-9163-8
27. Chan A-W, Tetzlaff JM, Gøtzsche PC, et al. SPIRIT 2013 explanation and elaboration: guidance for protocols of clinical trials. *BMJ : British Medical Journal* 2013;346 doi: 10.1136/bmj.e7586
28. Chan A, Tetzlaff JM, Altman DG, et al. Spirit 2013 statement: Defining standard protocol items for clinical trials. *Ann Intern Med* 2013;158(3):200-07. doi: 10.7326/0003-4819-158-3-201302050-00583
29. Kok G, Gottlieb NH, Peters G-JY, et al. A taxonomy of behaviour change methods: an Intervention Mapping approach. *Health Psychology Review* 2016;10(3):297-312.
30. Schroder HS, Dawood S, Yalch MM, et al. Evaluating the domain specificity of mental health-related mind-sets. *Social Psychological and Personality Science* 2016;7(6):508-20. doi: 10.1177/1948550616644657
31. Maniaci MR, Rogge RD. Caring about carelessness: Participant inattention and its effects on research. *Journal of Research in Personality* 2014;48:61-83. doi: 10.1016/j.jrp.2013.09.008
32. Ajzen I. The Theory of Planned Behavior. *Organ Behav Hum Decis Process* 1991;50(2):179-211. doi: 10.1016/0749-5978(91)90020-T

33. Schwarzer R. Modeling health behavior change: How to predict and modify the adoption and maintenance of health behaviors. *Applied Psychology* 2008;57(1):1-29. doi: 10.1111/j.1464-0597.2007.00325.x

34. McEachan RRC, Conner M, Taylor NJ, et al. Prospective prediction of health-related behaviours with the Theory of Planned Behaviour: a meta-analysis. *Health Psychology Review* 2011;5(2):97-144. doi: 10.1080/17437199.2010.521684

35. Zhang C, Zhang, R., Schwarzer, R., & Hagger, M. S. A meta-analysis of the health action process approach. *Pre-Print Available on PsyArXiv May 29 2018* doi: 10.31234/osf.io/4pc27

36. Ajzen I. Constructing a theory of planned behavior questionnaire, 2006.

37. Goldberg LR. A broad-bandwidth, public domain, personality inventory measuring the lower-level facets of several five-factor models. In: Mervielde I, Deary I, De Fruyt F, et al., eds. *Personality Psychology in Europe*. Tilburg, The Netherlands: Tilburg University Press 1999:7-28.

38. Goldberg LR. The development of markers for the Big-Five factor structure. *Psychol Assess* 1992;4(1):26. doi: 10.1037/1040-3590.4.1.26

39. Hamilton K, Keech JJ, Peden AE, et al. Alcohol use, aquatic injury, and unintentional drowning: A systematic literature review. *Drug Alcohol Rev* 2018 doi: 10.1111/dar.12817

**Authors' contributions** K.H, A.E.P, and M.S.H conceptualised the study. K.H, J.J.K, and M.S.H designed the study. M.S.H will conduct the data analysis, and K.H and M.S.H will interpret the findings. K.H and J.J.K drafted the manuscript with revisions provided by A.E.P and M.S.H. All authors reviewed and approved the final manuscript as submitted.

**Funding** The study is supported by a Royal Life Saving Society - Australia and Menzies Health Institute Queensland industry partnership grant. The sponsors have no role in the design, methods, participant recruitment, data collection, analysis, interpretation, preparation of this manuscript, or the decision to submit this article for publication, and they do not have ultimate authority over any of these activities.

**Acknowledgements** Martin S. Hagger's contribution was supported by a Finland Distinguished Professor (FiDiPro) award (Dnro 1801/31/2105) from Business Finland. This research is supported by Royal Life Saving Society – Australia. The drowning prevention research of Royal Life Saving Society – Australia is supported by the Australian Government. We would like to thank Kevin Judge (Senior Technical Officer – Health, Griffith University) for recording and producing the videos that will deliver the intervention and control condition stimuli. We would also like to thank the drivers who assisted with the pilot of intervention materials.

**Competing interests** Author A.E.P is employed by Royal Life Saving Society – Australia and affiliated with the College of Public Health, Medical and Veterinary Sciences, James Cook University, Townsville, Australia. Intervention development, data collection and analysis, and interpretation of findings is conducted independent of author A.E.P and Royal Life Saving Society – Australia.

**Ethics approval** The study protocol was approved by the Griffith University Human Research Ethics Committee (GU ref no: 2017/895).

**Data sharing statement** Data will be available following publication of the results at [osf.io/z7xph/](https://osf.io/z7xph/)

Table 1

*Behaviour change methods, targeted theoretical constructs, and implementation strategies.*

| Part                                    | Behaviour change method/s                                                                                          | Implementation strategy                                                                                                                                                                                                                                     | Target construct                                                                                                                                                               |
|-----------------------------------------|--------------------------------------------------------------------------------------------------------------------|-------------------------------------------------------------------------------------------------------------------------------------------------------------------------------------------------------------------------------------------------------------|--------------------------------------------------------------------------------------------------------------------------------------------------------------------------------|
| 1: Education                            | Information provision                                                                                              | Provide information about the risks of driving into floodwater                                                                                                                                                                                              | Attitudes, risk perception, perceived severity, perceived susceptibility                                                                                                       |
| 2: Promoting willingness to form a goal | Personalise risk<br>Scenario-based risk information<br>Provide opportunities for social comparison<br>Goal setting | Providing information about the personal risk; providing reasons people commonly drive into floodwater from prior studies; providing a strategy for overcoming barriers to avoiding driving into floodwater                                                 | Intention, attitudes, subjective norm, perceived behavioural control, risk perception, perceived severity, perceived susceptibility, anticipated regret, barrier self-efficacy |
| 3: Practice imagery exercise            | Guided practice (imagery skill)                                                                                    | Tangy lemon guided imagery task                                                                                                                                                                                                                             | Not applicable                                                                                                                                                                 |
| 4: Process mental simulation            | Implementation intentions<br>Goal setting<br>Planning coping responses<br>Guided practice<br>Using imagery         | Provide examples of things to do when floodwater is encountered; imagining the steps to use when encountering floodwater while driving; process mental simulation exercise                                                                                  | Intention, perceived behavioural control, barrier self-efficacy, action planning                                                                                               |
| 5: Outcome mental simulation            | Personalise risk<br>Information about others' approval<br>Provide contingent rewards<br>Using imagery              | Encouragement to think about the things that can happen when driving into floodwater and when avoiding driving into floodwater, including the risk and the benefits. Information about what important others will think; outcome mental simulation exercise | Intention, attitudes, subjective norm, perceived behavioural control, risk perception, perceived severity, perceived susceptibility, anticipated regret                        |
| 6: Conclusion                           | Cue altering                                                                                                       | Instructing that if ever in the situation to remember goal                                                                                                                                                                                                  | Barrier self-efficacy                                                                                                                                                          |

Note: Part 3 refers to the practice task which is designed to build imagery ability and does not relate to a target construct being assessed.

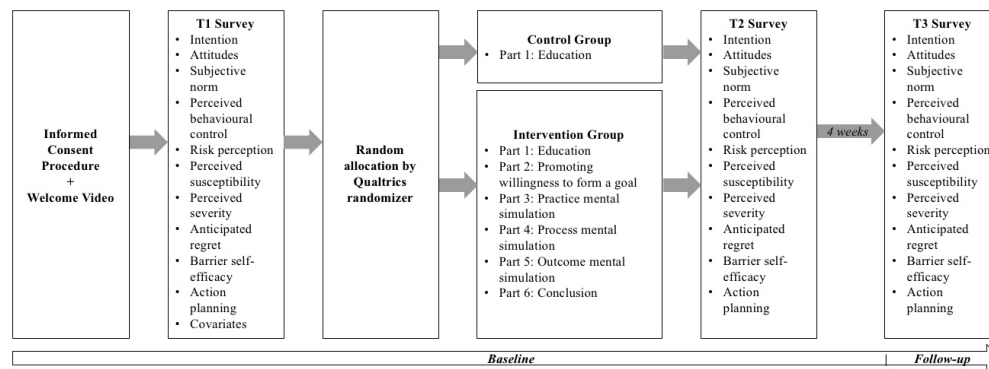

Figure 1. Randomised controlled trial design and participant progression through the study.

462x172mm (72 x 72 DPI)

Supplementary Material A – Mental Imagery Video Scripts

Note: The intervention group receives all of the below material. The control group receives the material indicated\*. Italicised text is displayed on screen in addition to being read aloud.

Welcome to the Study Video\*

| Audio                                                                                                                                                                                                                                                                                                                                                                                                                                                                                                           | Video        |
|-----------------------------------------------------------------------------------------------------------------------------------------------------------------------------------------------------------------------------------------------------------------------------------------------------------------------------------------------------------------------------------------------------------------------------------------------------------------------------------------------------------------|--------------|
| <p>Welcome to the study. Now that you have read through the study information and agreed to participate, I'd like to quickly recap what participating in the study today will involve. <i>First, there is a short survey for you to complete on the computer. Then, I will be back to guide you through some video exercises. Finally, I will leave you with another short survey to complete on the computer.</i></p> <p><i>Please now click to progress to the next page where the survey will begin.</i></p> | Neutral grey |

Introduction to Activity Video

| Intervention Group Audio                                                                                                                                                                                                                                                                                                                                                                                                                                                                                                                                                                                                                                                                                                                                                                                       | Control Group Audio*                                                                                                                                                                                                                                                                                                                                                                                             | Video        |
|----------------------------------------------------------------------------------------------------------------------------------------------------------------------------------------------------------------------------------------------------------------------------------------------------------------------------------------------------------------------------------------------------------------------------------------------------------------------------------------------------------------------------------------------------------------------------------------------------------------------------------------------------------------------------------------------------------------------------------------------------------------------------------------------------------------|------------------------------------------------------------------------------------------------------------------------------------------------------------------------------------------------------------------------------------------------------------------------------------------------------------------------------------------------------------------------------------------------------------------|--------------|
| <p>Thank you for answering those questions. For the next 10 or so minutes,</p> <p>I am going to guide you through a video.</p> <p>In the video, I am going to provide you with some information about driving during flood events.</p> <p>I am then going to guide you through some mental imagery exercises. In the exercises. In the exercises I will ask you to visualise several scenes in your mind.</p> <p>We will begin with a general imagery exercise to get you used to the idea and how it feels, and we will then turn to some exercises related to avoiding driving into floodwater.</p> <p>Before we start, I would like you to make yourself comfortable and to make sure you are free from distractions. When you are comfortable and ready to begin, please click to play the next video.</p> | <p>Thank you for answering those questions.</p> <p>I am going to guide you through a video.</p> <p>In the video, I am going to provide you with some information about driving during flood events.</p> <p>Before we start, I would like you to make yourself comfortable and to make sure you are free from distractions. When you are comfortable and ready to begin, please click to play the next video.</p> | Neutral grey |

**Part 1: Education\***

| Audio                                                                                                                                                                                                                                                                                                                                                                                                                                                                                                                                                                      | Video        |
|----------------------------------------------------------------------------------------------------------------------------------------------------------------------------------------------------------------------------------------------------------------------------------------------------------------------------------------------------------------------------------------------------------------------------------------------------------------------------------------------------------------------------------------------------------------------------|--------------|
| <p><i>Between 2002 and 2015, 89 drowning deaths occurred as a result of driving into floodwaters.</i></p> <p><i>Any flooded road can be deadly. Just a small amount of floodwater can wash your vehicle away.</i></p> <p><i>The second you decide to push through floodwater, you will give up control.</i></p> <p><i>The size of your vehicle doesn't matter, nor whether you've driven the road a hundred times before.</i></p> <p><i>No one can predict what lies underneath the surface. Even gently-moving floodwater can wash away the road surface beneath.</i></p> | Neutral grey |

**Part 2: Promoting Willingness to Form a Goal**

| Audio                                                                                                                                                                                                                                                                                                                                                                                                                                                                                                                                                                                                                                                                                                                                                                                                                                                                                                                                                                                                                                                                                                                                                                                                                                                                                                                            | Video                    |
|----------------------------------------------------------------------------------------------------------------------------------------------------------------------------------------------------------------------------------------------------------------------------------------------------------------------------------------------------------------------------------------------------------------------------------------------------------------------------------------------------------------------------------------------------------------------------------------------------------------------------------------------------------------------------------------------------------------------------------------------------------------------------------------------------------------------------------------------------------------------------------------------------------------------------------------------------------------------------------------------------------------------------------------------------------------------------------------------------------------------------------------------------------------------------------------------------------------------------------------------------------------------------------------------------------------------------------|--------------------------|
| <p>Driving into floodwater can affect anyone, including you. So, I would now like you to consider the potential for this to affect you.</p> <p>People are often tempted to drive into floodwater...</p> <ul style="list-style-type: none"> <li><i>To get home</i></li> <li><i>To get to work</i></li> <li><i>Because the other road takes longer</i></li> <li><i>Because they've done it before</i></li> <li><i>Because their 4wd can handle it</i></li> <li><i>Because others are driving through</i></li> <li><i>Because they think they can assess the risk and manage it</i></li> </ul> <p><i>But, it is incredibly risky.</i></p> <p>Driving into floodwaters puts you and your passengers at risk and it could be fatal.</p> <p>So, what I'd like you to consider today, is forming a goal to avoid driving into floodwater if you encounter it on your route.</p> <p>By considering the risks and thinking of a plan, you can avoid driving into floodwater. The best way to get started is to set a goal to avoid driving into any floodwater. You should aim to avoid driving into any floodwater. The mental imagery exercise will help you to achieve your goal.</p> <p>On the next page, there is a question to answer. Once you have answered the question, please proceed to the next page and play the video.</p> | Scenes from flood events |

Part 3: Practice Imagery Exercise

| Audio                                                                                                                                                                                                                                                                                                                                                                                                                                                                                                                                                                                                                                                                                                                                                                                                                                                                                                                                                                                                                                                                                                                                                                                                                                                                                                                                                                                                                                                                                                                                                                                                                                                                                                                                                                                               | Video              |
|-----------------------------------------------------------------------------------------------------------------------------------------------------------------------------------------------------------------------------------------------------------------------------------------------------------------------------------------------------------------------------------------------------------------------------------------------------------------------------------------------------------------------------------------------------------------------------------------------------------------------------------------------------------------------------------------------------------------------------------------------------------------------------------------------------------------------------------------------------------------------------------------------------------------------------------------------------------------------------------------------------------------------------------------------------------------------------------------------------------------------------------------------------------------------------------------------------------------------------------------------------------------------------------------------------------------------------------------------------------------------------------------------------------------------------------------------------------------------------------------------------------------------------------------------------------------------------------------------------------------------------------------------------------------------------------------------------------------------------------------------------------------------------------------------------|--------------------|
| <p>We will now begin a general exercise to get you used to the idea of mental imagery and how it feels.</p> <p>When doing mental imagery, people often find it useful to close their eyes.</p> <p>So now, let’s begin. The first exercise is to prepare you for the mental imagery exercise ahead. The idea is for you to just relax and visualise the images as I talk you through it.</p> <p>So, imagine this scene. You are in your kitchen. In front of you there is a chopping board and a sharp knife. On the chopping board is a large, round, ripe, bright yellow lemon. Look closely at the lemon.</p> <p>[5 second pause]</p> <p>Pick up the lemon. Feel the lightly pitted texture of the peel, the vividness of the yellow of its colour, and the strong, tangy lemon smell. You rub the lemon gently with your fingers, and that causes the smell to grow stronger. The smell transfers to your fingers as you rub it. Hold it up to the light and look at it for a moment. Notice its colour and texture.</p> <p>[5 second pause]</p> <p>Now, put the lemon back on the chopping board. Pick up the knife and imagine yourself cutting the lemon down the middle. Feel the pressure of the knife handle on your hand as you cut into the lemon. See the juice burst out of the lemon, and cascade on to the board. Smell the intensity of the smell of the lemon juice.</p> <p>[5 second pause]</p> <p>Ok, pause there. You can open your eyes, but just stay relaxed. That completes the first exercise. The idea was to get you used to imagining a scene with great intensity and to familiarise you with how to use imagery. Often imagery is quite challenging for people. The idea is to actually feel as if you are there, ‘in the moment’, and to use all of your senses.</p> | <p>Lemon image</p> |



Part 5: Outcome Mental Simulation

| Audio                                                                                                                                                                                                                                                                                                                                                                                                                                                                                                                                                                                                                                                                                                                                                                                                                                                                                                                                                                                                                                                                                                                                                                                                                                                                                                                                                                                                                                                                                                                                                                                                                                                                                                                                  | Video                                                                                                                                                                                                                                 |
|----------------------------------------------------------------------------------------------------------------------------------------------------------------------------------------------------------------------------------------------------------------------------------------------------------------------------------------------------------------------------------------------------------------------------------------------------------------------------------------------------------------------------------------------------------------------------------------------------------------------------------------------------------------------------------------------------------------------------------------------------------------------------------------------------------------------------------------------------------------------------------------------------------------------------------------------------------------------------------------------------------------------------------------------------------------------------------------------------------------------------------------------------------------------------------------------------------------------------------------------------------------------------------------------------------------------------------------------------------------------------------------------------------------------------------------------------------------------------------------------------------------------------------------------------------------------------------------------------------------------------------------------------------------------------------------------------------------------------------------|---------------------------------------------------------------------------------------------------------------------------------------------------------------------------------------------------------------------------------------|
| <p>Please again make yourself comfortable and make sure that you are free from distractions. I am now going to guide you through some more imagery. Again, you may find it helpful to close your eyes.</p> <p>[5 second pause]</p> <p>Now think about the potential things that could happen if you drive into floodwater.</p> <p>[10 second pause]</p> <p>Now think about some of the outcomes if you avoid driving into floodwater. For example: It took a little bit longer, but you made it home safely.</p> <p>[10 second pause]</p> <p>Now, think about your goal to not drive into any floodwater. Now close your eyes again and imagine yourself having achieved that goal.</p> <p>[10 second pause]</p> <p>Think of all the effort you put in to achieving your goal now that you have finally accomplished it. Imagine the result of accomplishing this goal.</p> <p>[10 second pause]</p> <p>Think about all of the benefits you will gain: your safety and your passenger’s safety; not suffering the expense of wrecking your car.</p> <p>Try to feel the satisfaction you would have with this accomplishment. Imagine a typical flood event and see yourself as someone who does not drive into floodwater.</p> <p>[10 second pause]</p> <p>Now, think about your loved ones, your family, children, and friends. What will they think if you achieved your goal to not drive into any floodwater?</p> <p>[10 second pause]</p> <p>Now you have finished your imagery, using the space below, please note down a few sentences summarising the positive benefits you imagined as a result of not driving into floodwater. It should be as detailed as possible. Spend about 2-3 minutes writing down your thoughts.</p> | <p>Car at night in rain approaching floodwater</p> <p>Black</p> <p>Car at night in rain approaching floodwater</p> <p>Black</p> <p>Car at night in rain approaching floodwater</p> <p>Car at night in rain approaching floodwater</p> |

**Part 6: Conclusion**

| Audio                                                                                                                                                                                          | Video        |
|------------------------------------------------------------------------------------------------------------------------------------------------------------------------------------------------|--------------|
| <i>Thank you for your attention, and if you're ever in the situation, please remember your goal. Please now proceed to the next page which contains some more questions for you to answer.</i> | Neutral grey |

For peer review only

Supplementary Material B

Items and response scales for measurement of psychological constructs

| Behaviour                                        |                                                                                         | Definition                                                                                                                                                                                                                                                                                                                                                                                                                                                                                                                                                                                     |
|--------------------------------------------------|-----------------------------------------------------------------------------------------|------------------------------------------------------------------------------------------------------------------------------------------------------------------------------------------------------------------------------------------------------------------------------------------------------------------------------------------------------------------------------------------------------------------------------------------------------------------------------------------------------------------------------------------------------------------------------------------------|
| Driving through floodwater <sup>a</sup>          |                                                                                         | The following questions will ask about your knowledge and attitudes towards driving through floodwater. “Floodwater” refers to a body of water covering land that is normally dry. For the next questions, please think about your driving through floodwater. For example, think about the scenario where you are driving in your car immediately after a thunderstorm. You approach a section of the road that is completely covered in water. Now consider your future driving, if such a scenario occurred, how likely are you in the future to drive through the floodwater...?”.         |
| Avoiding driving through floodwater <sup>b</sup> |                                                                                         | The following questions will ask about your knowledge and attitudes towards driving through floodwater. “Floodwater” refers to a body of water covering land that is normally dry. For the next questions, please think about your driving through floodwater. For example, think about the scenario where you are driving in your car immediately after a thunderstorm. You approach a section of the road that is completely covered in water. Now consider your future driving, if such a scenario occurred, how likely are you in the future to AVOID driving through the floodwater...?”. |
| Construct                                        | Items                                                                                   | Scoring                                                                                                                                                                                                                                                                                                                                                                                                                                                                                                                                                                                        |
| Intention <sup>a</sup>                           | I intend to drive through the floodwater.                                               | [1] extremely unlikely – [7] extremely likely                                                                                                                                                                                                                                                                                                                                                                                                                                                                                                                                                  |
|                                                  | I expect I would drive through the floodwater.                                          |                                                                                                                                                                                                                                                                                                                                                                                                                                                                                                                                                                                                |
|                                                  | It is likely that I will drive through the floodwater.                                  |                                                                                                                                                                                                                                                                                                                                                                                                                                                                                                                                                                                                |
|                                                  | In general, I would be willing to drive through the floodwater.                         |                                                                                                                                                                                                                                                                                                                                                                                                                                                                                                                                                                                                |
| Attitudes <sup>a</sup>                           | If I were to drive through the floodwater, it would be...                               | [1] bad – [7] good                                                                                                                                                                                                                                                                                                                                                                                                                                                                                                                                                                             |
|                                                  |                                                                                         | [1] harmful – [7] harmless                                                                                                                                                                                                                                                                                                                                                                                                                                                                                                                                                                     |
|                                                  |                                                                                         | [1] unwise – [7] wise                                                                                                                                                                                                                                                                                                                                                                                                                                                                                                                                                                          |
|                                                  |                                                                                         | [1] intelligent – [7] stupid                                                                                                                                                                                                                                                                                                                                                                                                                                                                                                                                                                   |
|                                                  |                                                                                         | [1] negative – [7] positive                                                                                                                                                                                                                                                                                                                                                                                                                                                                                                                                                                    |
| Subjective Norm <sup>a</sup>                     | Most people who are important to me would approve of me driving through the floodwater. | [1] strongly disagree – [7] strongly agree                                                                                                                                                                                                                                                                                                                                                                                                                                                                                                                                                     |
|                                                  | Those people who are important to me think that I should drive through the floodwater.  |                                                                                                                                                                                                                                                                                                                                                                                                                                                                                                                                                                                                |
|                                                  | Those people who are important to me would want me to drive through the floodwater.     |                                                                                                                                                                                                                                                                                                                                                                                                                                                                                                                                                                                                |

|                                            |                                                                                                                 |                                                         |
|--------------------------------------------|-----------------------------------------------------------------------------------------------------------------|---------------------------------------------------------|
|                                            | Those people who are similar to me would drive through the floodwater.                                          |                                                         |
|                                            | Most people like me would drive through the floodwater.                                                         |                                                         |
| Perceived Behavioural Control <sup>a</sup> | It is mostly up to me whether I drive through the floodwater.                                                   | [1] strongly disagree – [7] strongly agree              |
|                                            | I have complete control over whether I drive through the floodwater.                                            |                                                         |
|                                            | It would be easy for me to drive through the floodwater.                                                        |                                                         |
|                                            | I am confident I could drive through the floodwater.                                                            |                                                         |
| Risk perception <sup>a</sup>               | It would be risky for me to drive through the floodwater.                                                       | [1] strongly disagree – [7] strongly agree              |
|                                            | If I drive through the floodwater there would be risk involved.                                                 |                                                         |
| Perceived susceptibility <sup>a</sup>      | My chances of having trouble if I drive through the floodwater are great.                                       | [1] extremely unsusceptible – [7] extremely susceptible |
|                                            | There is a good possibility that I will have trouble if I drive through the floodwater.                         |                                                         |
|                                            | I would be worried about having trouble if I drove through the floodwater.                                      |                                                         |
| Perceived severity <sup>a</sup>            | If I drive through the floodwater, the consequences would be...?                                                | [1] not at all severe – [7] extremely severe            |
|                                            | If you drive through the floodwater, to what extent would it impact severely on your life?                      |                                                         |
| Anticipated regret <sup>a</sup>            | If I were to drive through the floodwater, I would feel regret.                                                 | [1] strongly disagree – [7] strongly agree              |
|                                            | If I were to drive through the floodwater, I would feel sorry for doing it.                                     |                                                         |
|                                            | I would feel upset if I drove through the floodwater.                                                           |                                                         |
| Barrier self-efficacy <sup>b</sup>         | I am confident I can avoid driving through floodwaters in the future...?                                        | [1] not at all confident – [7] definitely confident     |
|                                            | ... even when I might be late for work                                                                          |                                                         |
|                                            | ... even when I need to get to my children/other family members                                                 |                                                         |
|                                            | ... even when I need to get home to check on the house/pets etc                                                 |                                                         |
|                                            | ... even when the alternative route will take more time/is inconvenient                                         |                                                         |
|                                            | ... even when I see others driving through                                                                      |                                                         |
|                                            | ... even when I think I can make it                                                                             |                                                         |
|                                            | ... even when I feel pressure from others to drive through                                                      |                                                         |
|                                            | ... even when I know others are around to help if something goes wrong                                          |                                                         |
|                                            | ... even when I think my vehicle is capable to drive through                                                    |                                                         |
| Action planning <sup>b</sup>               | Do you have a plan with regard to AVOIDING driving through floodwater next time you encounter it on your route? | [1] not at all true – [7] exactly true                  |
|                                            | When to avoid driving through floodwater                                                                        |                                                         |
|                                            | Where to avoid driving through floodwater                                                                       |                                                         |
|                                            | How to avoid driving through floodwater                                                                         |                                                         |
|                                            | How often to avoid driving through floodwater                                                                   |                                                         |

1  
2  
3  
4  
5  
6  
7  
8  
9  
10  
11  
12  
13  
14  
15  
16  
17  
18  
19  
20  
21  
22  
23  
24  
25  
26  
27  
28  
29  
30  
31  
32  
33  
34  
35  
36  
37  
38  
39  
40  
41  
42  
43  
44  
45  
46

|                                         |                                                                                                                                                                                                         |                                              |
|-----------------------------------------|---------------------------------------------------------------------------------------------------------------------------------------------------------------------------------------------------------|----------------------------------------------|
| Imagery ability <sup>c</sup>            | Typically, I...                                                                                                                                                                                         | [1] very inaccurate – [5] very accurate      |
|                                         | Have a rich vocabulary                                                                                                                                                                                  |                                              |
|                                         | Have difficulty understanding abstract ideas                                                                                                                                                            |                                              |
|                                         | Have a vivid imagination                                                                                                                                                                                |                                              |
|                                         | Am not interested in abstract ideas                                                                                                                                                                     |                                              |
|                                         | Have excellent ideas                                                                                                                                                                                    |                                              |
|                                         | Do not have a good imagination                                                                                                                                                                          |                                              |
|                                         | Am quick to understand things                                                                                                                                                                           |                                              |
|                                         | Use difficult words                                                                                                                                                                                     |                                              |
|                                         | Spend time reflecting on things                                                                                                                                                                         |                                              |
|                                         | Am full of ideas                                                                                                                                                                                        |                                              |
| Willingness to form a goal <sup>c</sup> | Now that you have heard some information about driving into floodwater, please indicate your agreement with the following statement:<br>I am willing to form a goal to avoid driving through floodwater | [1] strongly disagree – [7] strongly agree   |
| Imagery fidelity <sup>d</sup>           | Vividness: How VIVID was the mental image that you had of yourself avoiding driving through the floodwater?                                                                                             | [1] not at all vivid – [7] very vivid        |
|                                         | Clarity: How CLEAR was the mental image that you had of yourself avoiding driving through the floodwater?                                                                                               | [1] not at all clear – [7] very clear        |
|                                         | Detail: How DETAILED were the images that you had of yourself avoiding driving through the floodwater?                                                                                                  | [1] not at all detailed – [7] very detailed  |
|                                         | Ease: How easy or difficult was it for you to create these images?                                                                                                                                      | [1] extremely easy – [7] extremely difficult |

---

Note: <sup>c</sup>covariate; <sup>d</sup>intervention group only

## Supplementary Material C – Informed Consent Materials

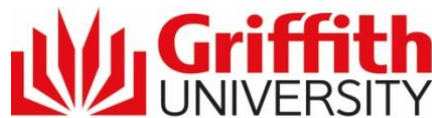

### Investigating Driver Behaviour During Floods

#### INFORMATION SHEET

|                                                                                                                                                                                   |                                                                                                                                                                                                                                                    |
|-----------------------------------------------------------------------------------------------------------------------------------------------------------------------------------|----------------------------------------------------------------------------------------------------------------------------------------------------------------------------------------------------------------------------------------------------|
| <b>Chief Investigator</b><br>Dr Kyra Hamilton, Senior Lecturer<br>School of Applied Psychology, Griffith University<br>Ph: (07) 3735 3334<br>Email: kyra.hamilton@griffith.edu.au | <b>Co-Investigator</b><br>Mr Jacob Keech, PhD Candidate<br>School of Applied Psychology, Griffith University<br>Ph: (07) 3735 3383<br>Email: j.keech@griffith.edu.au                                                                               |
| <b>Co- Investigator</b><br>Ms Amy Peden, National Manager– Research and Policy<br>Royal Life Saving Society – Australia<br>Ph: (02) 8217 3133<br>Email: apeden@rlssa.org.au       | <b>Co- Investigator</b><br>Prof Martin Hagger, John Curtin Distinguished Professor<br>Health Psychology and Behavioural Medicine Research Group School of Psychology and Speech Pathology, Curtin University<br>Email: martin.hagger@curtin.edu.au |

#### Why is the research being conducted?

The aim of the current study is to develop an understanding of driver behaviour during floods. The research team requests your assistance in helping us with this research.

#### What you will be asked to do

Your participation in this project will involve completing a brief online survey that will ask questions about your knowledge and attitudes toward driving through floodwater. You will also be asked to provide some background demographic details. This information is not used to identify you in any way but rather it will tell us about the representation of the individuals participating in the study. In addition, you will be required to watch a short 5-minute video and then fill in another online survey. The study will take approximately 35 minutes to complete. One week and four weeks after completing these tasks we will contact you by email and ask you to complete another short questionnaire, which will take approximately 15 minutes. These videos will require sound and you will need to be in a place that is quiet and free from distractions. You may prefer to use headphones to reduce distractions from background noise. The survey has been optimised for computer delivery and may not work properly on smartphones.

#### Participant selection and/or screening

We welcome your participation if you have are an Australian resident with a registered driver's licence.

#### The expected benefits of the research

It is expected that this project will not directly benefit you. However, your involvement will provide valuable information about decisions regarding driving through floodwater and, therefore, may benefit others through a greater understanding of these processes.

#### Risks to you

It is unlikely that there are any risks greater than daily living involved with participation in this project. However, should you experience any discomfort due to undertaking this survey, Lifeline (13 11 14) offers a free 24 hour telephone counselling service.

#### Your participation is voluntary

Your participation in this project is completely voluntary and you may cease participation at any time. If you agree to participate, you can withdraw from participation at any time during the project without comment or penalty. However, once your responses have been submitted and we have de-identified them, you will be unable to withdraw. Your decision to participate will in no way impact upon your current or future relationship with Griffith University.

**Your confidentiality**

The information you provide will be treated confidentially and all comments and responses are anonymous. Please do not put your name on the questionnaire. Your responses to the questionnaire will form part of a large data response set, which will initially be stored by Qualtrics. Research data from Qualtrics will be downloaded and stored securely on Griffith University's Google Drive or OneDrive allocation. Data will be password-protected and accessible only to members of the research team. As required by Griffith University, all research data (survey responses and analysis) will be retained in a password-protected electronic file for a minimum period of five years before being destroyed. Participants will be given the opportunity separately to express consent to be contacted for the follow-up survey. These contact details will be deleted following conclusion of the follow-up survey. A personal code identifier will be used to match surveys. Participants' data will not be identifiable in any publication or reporting. In the interest of researcher transparency, a strictly de-identified version of the research data will be prepared and made available on the online open data repository Open Science Framework (<https://osf.io/>).

**Consent to participate**

Completion and submission of the survey will be accepted as informed consent to participate.

**Questions / further information about the project**

Please contact the research team members if you have any questions or require further information about the project.

**Feedback to you**

No automatic feedback will be given to you about the results of this study. However, if you participate and wish to receive a summary of the research results once the study has been completed, you can email the research team members.

**The ethical conduct of project**

Griffith University conducts research in accordance with the *National Statement on Ethical Conduct in Human Research*. If you do have any concerns or complaints about the ethical conduct of the project you may contact the Manager, Research Ethics on (07) 3735 4375 or [research-ethics@griffith.edu.au](mailto:research-ethics@griffith.edu.au). This project has received ethical approval from the Griffith University Human Research Ethics Committee (GU Ref no: 2017/895).

# Reporting checklist for protocol of a clinical trial.

Based on the SPIRIT guidelines.

## Instructions to authors

Complete this checklist by entering the page numbers from your manuscript where readers will find each of the items listed below.

Your article may not currently address all the items on the checklist. Please modify your text to include the missing information. If you are certain that an item does not apply, please write "n/a" and provide a short explanation.

Upload your completed checklist as an extra file when you submit to a journal.

In your methods section, say that you used the SPIRIT reporting guidelines, and cite them as:

Chan A-W, Tetzlaff JM, Altman DG, Laupacis A, Gøtzsche PC, Krleža-Jerić K, Hróbjartsson A, Mann H, Dickersin K, Berlin J, Doré C, Parulekar W, Summerskill W, Groves T, Schulz K, Sox H, Rockhold FW, Rennie D, Moher D. SPIRIT 2013 Statement: Defining standard protocol items for clinical trials. *Ann Intern Med.* 2013;158(3):200-207

|                                             |     | Reporting Item                                                                                               | Page Number |
|---------------------------------------------|-----|--------------------------------------------------------------------------------------------------------------|-------------|
| Title                                       | #1  | Descriptive title identifying the study design, population, interventions, and, if applicable, trial acronym | 1           |
| Trial registration                          | #2a | Trial identifier and registry name. If not yet registered, name of intended registry                         | 2           |
| Trial registration: data set                | #2b | All items from the World Health Organization Trial Registration Data Set                                     | N/A         |
| Protocol version                            | #3  | Date and version identifier                                                                                  | N/A         |
| Funding                                     | #4  | Sources and types of financial, material, and other support                                                  | 22          |
| Roles and responsibilities: contributorship | #5a | Names, affiliations, and roles of protocol contributors                                                      | 22          |
| Roles and responsibilities:                 | #5b | Name and contact information for the trial sponsor                                                           | 22          |

|    |                      |      |                                                                   |      |
|----|----------------------|------|-------------------------------------------------------------------|------|
| 1  | sponsor contact      |      |                                                                   |      |
| 2  | information          |      |                                                                   |      |
| 3  |                      |      |                                                                   |      |
| 4  | Roles and            | #5c  | Role of study sponsor and funders, if any, in study design;       | 22   |
| 5  | responsibilities:    |      | collection, management, analysis, and interpretation of           |      |
| 6  | sponsor and funder   |      | data; writing of the report; and the decision to submit the       |      |
| 7  |                      |      | report for publication, including whether they will have          |      |
| 8  |                      |      | ultimate authority over any of these activities                   |      |
| 9  |                      |      |                                                                   |      |
| 10 |                      |      |                                                                   |      |
| 11 |                      |      |                                                                   |      |
| 12 | Roles and            | #5d  | Composition, roles, and responsibilities of the coordinating      | N/A  |
| 13 | responsibilities:    |      | centre, steering committee, endpoint adjudication                 |      |
| 14 | committees           |      | committee, data management team, and other individuals or         |      |
| 15 |                      |      | groups overseeing the trial, if applicable (see Item 21a for      |      |
| 16 |                      |      | data monitoring committee)                                        |      |
| 17 |                      |      |                                                                   |      |
| 18 |                      |      |                                                                   |      |
| 19 |                      |      |                                                                   |      |
| 20 | Background and       | #6a  | Description of research question and justification for            | 3-6  |
| 21 | rationale            |      | undertaking the trial, including summary of relevant studies      |      |
| 22 |                      |      | (published and unpublished) examining benefits and harms          |      |
| 23 |                      |      | for each intervention                                             |      |
| 24 |                      |      |                                                                   |      |
| 25 |                      |      |                                                                   |      |
| 26 |                      |      |                                                                   |      |
| 27 | Background and       | #6b  | Explanation for choice of comparators                             | 10   |
| 28 | rationale: choice of |      |                                                                   |      |
| 29 | comparators          |      |                                                                   |      |
| 30 |                      |      |                                                                   |      |
| 31 |                      |      |                                                                   |      |
| 32 | Objectives           | #7   | Specific objectives or hypotheses                                 | 5-6  |
| 33 |                      |      |                                                                   |      |
| 34 |                      |      |                                                                   |      |
| 35 | Trial design         | #8   | Description of trial design including type of trial (eg, parallel | 7    |
| 36 |                      |      | group, crossover, factorial, single group), allocation ratio,     |      |
| 37 |                      |      | and framework (eg, superiority, equivalence, non-inferiority,     |      |
| 38 |                      |      | exploratory)                                                      |      |
| 39 |                      |      |                                                                   |      |
| 40 |                      |      |                                                                   |      |
| 41 |                      |      |                                                                   |      |
| 42 | Study setting        | #9   | Description of study settings (eg, community clinic,              | 7    |
| 43 |                      |      | academic hospital) and list of countries where data will be       |      |
| 44 |                      |      | collected. Reference to where list of study sites can be          |      |
| 45 |                      |      | obtained                                                          |      |
| 46 |                      |      |                                                                   |      |
| 47 |                      |      |                                                                   |      |
| 48 |                      |      |                                                                   |      |
| 49 | Eligibility criteria | #10  | Inclusion and exclusion criteria for participants. If applicable, | 7-8  |
| 50 |                      |      | eligibility criteria for study centres and individuals who will   |      |
| 51 |                      |      | perform the interventions (eg, surgeons, psychotherapists)        |      |
| 52 |                      |      |                                                                   |      |
| 53 |                      |      |                                                                   |      |
| 54 | Interventions:       | #11a | Interventions for each group with sufficient detail to allow      | 8-10 |
| 55 | description          |      | replication, including how and when they will be                  |      |
| 56 |                      |      | administered                                                      |      |
| 57 |                      |      |                                                                   |      |
| 58 |                      |      |                                                                   |      |
| 59 |                      |      |                                                                   |      |
| 60 |                      |      |                                                                   |      |

|                                 |      |                                                                                                                                                                                                                                                                                                                                                                                |          |
|---------------------------------|------|--------------------------------------------------------------------------------------------------------------------------------------------------------------------------------------------------------------------------------------------------------------------------------------------------------------------------------------------------------------------------------|----------|
| Interventions: modifications    | #11b | Criteria for discontinuing or modifying allocated interventions for a given trial participant (eg, drug dose change in response to harms, participant request, or improving / worsening disease)                                                                                                                                                                               | N/A      |
| Interventions: adherence        | #11c | Strategies to improve adherence to intervention protocols, and any procedures for monitoring adherence (eg, drug tablet return; laboratory tests)                                                                                                                                                                                                                              | 8        |
| Interventions: concomitant care | #11d | Relevant concomitant care and interventions that are permitted or prohibited during the trial                                                                                                                                                                                                                                                                                  | N/A      |
| Outcomes                        | #12  | Primary, secondary, and other outcomes, including the specific measurement variable (eg, systolic blood pressure), analysis metric (eg, change from baseline, final value, time to event), method of aggregation (eg, median, proportion), and time point for each outcome. Explanation of the clinical relevance of chosen efficacy and harm outcomes is strongly recommended | 10-13    |
| Participant timeline            | #13  | Time schedule of enrolment, interventions (including any run-ins and washouts), assessments, and visits for participants. A schematic diagram is highly recommended (see Figure)                                                                                                                                                                                               | Figure 1 |
| Sample size                     | #14  | Estimated number of participants needed to achieve study objectives and how it was determined, including clinical and statistical assumptions supporting any sample size calculations                                                                                                                                                                                          | 13       |
| Recruitment                     | #15  | Strategies for achieving adequate participant enrolment to reach target sample size                                                                                                                                                                                                                                                                                            | 7-8      |
| Allocation: sequence generation | #16a | Method of generating the allocation sequence (eg, computer-generated random numbers), and list of any factors for stratification. To reduce predictability of a random sequence, details of any planned restriction (eg, blocking) should be provided in a separate document that is unavailable to those who enrol participants or assign interventions                       | 8        |
| Allocation concealment          | #16b | Mechanism of implementing the allocation sequence (eg, central telephone; sequentially numbered, opaque, sealed                                                                                                                                                                                                                                                                | 8        |

|                                                  |      |                                                                                                                                                                                                                                                                                                                                                                                                              |       |
|--------------------------------------------------|------|--------------------------------------------------------------------------------------------------------------------------------------------------------------------------------------------------------------------------------------------------------------------------------------------------------------------------------------------------------------------------------------------------------------|-------|
| mechanism                                        |      | envelopes), describing any steps to conceal the sequence until interventions are assigned                                                                                                                                                                                                                                                                                                                    |       |
| Allocation: implementation                       | #16c | Who will generate the allocation sequence, who will enrol participants, and who will assign participants to interventions                                                                                                                                                                                                                                                                                    | 8     |
| Blinding (masking)                               | #17a | Who will be blinded after assignment to interventions (eg, trial participants, care providers, outcome assessors, data analysts), and how                                                                                                                                                                                                                                                                    | 7-8   |
| Blinding (masking): emergency unblinding         | #17b | If blinded, circumstances under which unblinding is permissible, and procedure for revealing a participant's allocated intervention during the trial                                                                                                                                                                                                                                                         | N/A   |
| Data collection plan                             | #18a | Plans for assessment and collection of outcome, baseline, and other trial data, including any related processes to promote data quality (eg, duplicate measurements, training of assessors) and a description of study instruments (eg, questionnaires, laboratory tests) along with their reliability and validity, if known. Reference to where data collection forms can be found, if not in the protocol | 7-8   |
| Data collection plan: retention                  | #18b | Plans to promote participant retention and complete follow-up, including list of any outcome data to be collected for participants who discontinue or deviate from intervention protocols                                                                                                                                                                                                                    | 8     |
| Data management                                  | #19  | Plans for data entry, coding, security, and storage, including any related processes to promote data quality (eg, double data entry; range checks for data values). Reference to where details of data management procedures can be found, if not in the protocol                                                                                                                                            | 15-16 |
| Statistics: outcomes                             | #20a | Statistical methods for analysing primary and secondary outcomes. Reference to where other details of the statistical analysis plan can be found, if not in the protocol                                                                                                                                                                                                                                     | 14    |
| Statistics: additional analyses                  | #20b | Methods for any additional analyses (eg, subgroup and adjusted analyses)                                                                                                                                                                                                                                                                                                                                     | N/A   |
| Statistics: analysis population and missing data | #20c | Definition of analysis population relating to protocol non-adherence (eg, as randomised analysis), and any statistical methods to handle missing data (eg, multiple imputation)                                                                                                                                                                                                                              | 14    |

|                                               |      |                                                                                                                                                                                                                                                                                                                                                      |       |
|-----------------------------------------------|------|------------------------------------------------------------------------------------------------------------------------------------------------------------------------------------------------------------------------------------------------------------------------------------------------------------------------------------------------------|-------|
| 1 Data monitoring:<br>2 formal committee      | #21a | Composition of data monitoring committee (DMC); summary<br>of its role and reporting structure; statement of whether it is<br>independent from the sponsor and competing interests; and<br>reference to where further details about its charter can be<br>found, if not in the protocol. Alternatively, an explanation of<br>why a DMC is not needed | 16    |
| 11 Data monitoring:<br>12 interim analysis    | #21b | Description of any interim analyses and stopping guidelines,<br>including who will have access to these interim results and<br>make the final decision to terminate the trial                                                                                                                                                                        | 14    |
| 16 Harms                                      | #22  | Plans for collecting, assessing, reporting, and managing<br>solicited and spontaneously reported adverse events and<br>other unintended effects of trial interventions or trial conduct                                                                                                                                                              | 15    |
| 21 Auditing                                   | #23  | Frequency and procedures for auditing trial conduct, if any,<br>and whether the process will be independent from<br>investigators and the sponsor                                                                                                                                                                                                    | N/A   |
| 27 Research ethics<br>28 approval             | #24  | Plans for seeking research ethics committee / institutional<br>review board (REC / IRB) approval                                                                                                                                                                                                                                                     | 15    |
| 31 Protocol<br>32 amendments                  | #25  | Plans for communicating important protocol modifications<br>(eg, changes to eligibility criteria, outcomes, analyses) to<br>relevant parties (eg, investigators, REC / IRBs, trial<br>participants, trial registries, journals, regulators)                                                                                                          | 15    |
| 37 Consent or assent                          | #26a | Who will obtain informed consent or assent from potential<br>trial participants or authorised surrogates, and how (see<br>Item 32)                                                                                                                                                                                                                   | 15    |
| 43 Consent or assent:<br>44 ancillary studies | #26b | Additional consent provisions for collection and use of<br>participant data and biological specimens in ancillary<br>studies, if applicable                                                                                                                                                                                                          | N/A   |
| 48 Confidentiality                            | #27  | How personal information about potential and enrolled<br>participants will be collected, shared, and maintained in<br>order to protect confidentiality before, during, and after the<br>trial                                                                                                                                                        | 15    |
| 55 Declaration of<br>56 interests             | #28  | Financial and other competing interests for principal<br>investigators for the overall trial and each study site                                                                                                                                                                                                                                     | 22    |
| 58 Data access                                | #29  | Statement of who will have access to the final trial dataset,                                                                                                                                                                                                                                                                                        | 15-16 |

|    |                       |      |                                                                 |         |
|----|-----------------------|------|-----------------------------------------------------------------|---------|
| 1  |                       |      | and disclosure of contractual agreements that limit such        |         |
| 2  |                       |      | access for investigators                                        |         |
| 3  |                       |      |                                                                 |         |
| 4  | Ancillary and post    | #30  | Provisions, if any, for ancillary and post-trial care, and for  | 15      |
| 5  | trial care            |      | compensation to those who suffer harm from trial                |         |
| 6  |                       |      | participation                                                   |         |
| 7  |                       |      |                                                                 |         |
| 8  |                       |      |                                                                 |         |
| 9  | Dissemination policy: | #31a | Plans for investigators and sponsor to communicate trial        | 16      |
| 10 | trial results         |      | results to participants, healthcare professionals, the public,  |         |
| 11 |                       |      | and other relevant groups (eg, via publication, reporting in    |         |
| 12 |                       |      | results databases, or other data sharing arrangements),         |         |
| 13 |                       |      | including any publication restrictions                          |         |
| 14 |                       |      |                                                                 |         |
| 15 |                       |      |                                                                 |         |
| 16 |                       |      |                                                                 |         |
| 17 | Dissemination policy: | #31b | Authorship eligibility guidelines and any intended use of       | 16      |
| 18 | authorship            |      | professional writers                                            |         |
| 19 |                       |      |                                                                 |         |
| 20 |                       |      |                                                                 |         |
| 21 | Dissemination policy: | #31c | Plans, if any, for granting public access to the full protocol, | 16 & 22 |
| 22 | reproducible          |      | participant-level dataset, and statistical code                 |         |
| 23 | research              |      |                                                                 |         |
| 24 |                       |      |                                                                 |         |
| 25 |                       |      |                                                                 |         |
| 26 |                       |      |                                                                 |         |
| 27 | Informed consent      | #32  | Model consent form and other related documentation given        | Supp C  |
| 28 | materials             |      | to participants and authorised surrogates                       |         |
| 29 |                       |      |                                                                 |         |
| 30 |                       |      |                                                                 |         |
| 31 | Biological specimens  | #33  | Plans for collection, laboratory evaluation, and storage of     | N/A     |
| 32 |                       |      | biological specimens for genetic or molecular analysis in the   |         |
| 33 |                       |      | current trial and for future use in ancillary studies, if       |         |
| 34 |                       |      | applicable                                                      |         |
| 35 |                       |      |                                                                 |         |
| 36 |                       |      |                                                                 |         |

37 The SPIRIT checklist is distributed under the terms of the Creative Commons Attribution License CC-  
38 BY-ND 3.0. This checklist was completed on 20. July 2018 using <http://www.goodreports.org/>, a tool  
39 made by the [EQUATOR Network](#) in collaboration with [Penelope.ai](#)  
40  
41  
42  
43  
44  
45  
46  
47  
48  
49  
50  
51  
52  
53  
54  
55  
56  
57  
58  
59  
60

# BMJ Open

## **A protocol for developing a mental imagery intervention: A randomised controlled trial testing a novel implementation imagery e-health intervention to change driver behaviour during floods**

|                                 |                                                                                                                                                                                                                                                                                                                                                                                                                                                    |
|---------------------------------|----------------------------------------------------------------------------------------------------------------------------------------------------------------------------------------------------------------------------------------------------------------------------------------------------------------------------------------------------------------------------------------------------------------------------------------------------|
| Journal:                        | <i>BMJ Open</i>                                                                                                                                                                                                                                                                                                                                                                                                                                    |
| Manuscript ID                   | bmjopen-2018-025565.R1                                                                                                                                                                                                                                                                                                                                                                                                                             |
| Article Type:                   | Protocol                                                                                                                                                                                                                                                                                                                                                                                                                                           |
| Date Submitted by the Author:   | 16-Nov-2018                                                                                                                                                                                                                                                                                                                                                                                                                                        |
| Complete List of Authors:       | Hamilton, Kyra; Griffith University, School of Applied Psychology<br>Keech, Jacob; Griffith University, School of Applied Psychology<br>Peden, Amy; Royal Life Saving Society Australia, Research and Policy Department; James Cook University Division of Tropical Health and Medicine, College of Public Health, Medical and Veterinary Sciences<br>Hagger, Martin; Curtin University, Health Psychology and Behavioural Medicine Research Group |
| <b>Primary Subject Heading</b>: | Public health                                                                                                                                                                                                                                                                                                                                                                                                                                      |
| Secondary Subject Heading:      | Evidence based practice                                                                                                                                                                                                                                                                                                                                                                                                                            |
| Keywords:                       | Flooded waterways, Social-cognitive theories, Driving, Drowning, Water safety, Mental imagery                                                                                                                                                                                                                                                                                                                                                      |
|                                 |                                                                                                                                                                                                                                                                                                                                                                                                                                                    |

SCHOLARONE™  
Manuscripts

**A protocol for developing a mental imagery intervention: A randomised controlled trial testing a novel implementation imagery e-health intervention to change driver behaviour during floods**

Kyra Hamilton<sup>1,2\*</sup>, Jacob J. Keech<sup>1</sup>, Amy E. Peden<sup>3,4</sup> & Martin S. Hagger<sup>2,5</sup>

<sup>1</sup>School of Applied Psychology, Griffith University, Brisbane, Australia

<sup>2</sup>School of Psychology, Health Psychology and Behavioural Medicine Research Group, Curtin University, Perth, Western Australia, Australia.

<sup>3</sup>Royal Life Saving Society – Australia, Broadway, New South Wales, Australia

<sup>4</sup>College of Public Health, Medical and Veterinary Sciences, James Cook University, Townsville, Queensland, Australia

<sup>5</sup>Faculty of Sport and Health Sciences, University of Jyväskylä, Jyväskylä, Finland

\*For correspondence contact: Dr. Kyra Hamilton, Health and Psychology Innovations (HaPI) Research Lab, School of Applied Psychology, Griffith University, 176 Messines Ridge Road, Mt Gravatt, QLD 4122. Email: [kyra.hamilton@griffith.edu.au](mailto:kyra.hamilton@griffith.edu.au); Ph: +61 7 373 53334

Journal: BMJ Open

Type of Contribution: Research protocol

## Abstract

**Introduction:** Drowning due to driving into floodwater accounts for a significant proportion of all deaths by drowning. Despite awareness campaigns such as ‘If it’s flooded, forget it’, people continue to drive into floodwater. This causes loss of life, risk to rescuers, and damage to vehicles. The aim of this study was to develop and evaluate an online e-health intervention to promote safe driving behaviour during flood events.

**Methods and analysis:** The study will utilise a 2x3 randomised controlled trial in which participants are randomised into one of two conditions: (1) education about the risks of driving into floodwater; or, (2) education about the risks of driving into floodwater plus a theory-based behaviour change intervention using planning and imagery exercises. The effect of the intervention on the primary outcome, intention to drive through floodwater, and the secondary outcomes, will be assessed using a series of mixed-model ANCOVAs.

**Ethics and dissemination:** The study has been approved by the Griffith University Human Research Ethics Committee. Participants will review a study information sheet and provide informed consent prior to commencing participation. Results will be disseminated through peer-reviewed publications, industry reports, media releases, and at academic conferences. Deidentified data will be made publicly available following publication of the results.

**Trial Registration:** ACTRN12618001212246

Available at: <http://www.ANZCTR.org.au/ACTRN12618001212246.aspx>

**Keywords:** Flooded waterways; social cognitive theories; driving; drowning, water safety; mental imagery

### Article Summary

- The study intervention is theory-based, consisting of a novel integration of effective behaviour change strategies.
- The study will use a sample with key demographic characteristics proportional to the distribution of flood-related transport deaths in the Australian population, ensuring that the results are generalisable.
- While the outcomes are an extensive range of psychological variables established to predict driving into floodwater, the unpredictable occurrence of flood events means that examining the effect of our intervention on actual behaviour is not feasible within the timeframe of the study.

Introduction

Drowning is the third leading cause of injury-related deaths worldwide <sup>1</sup> and the leading cause of death during times of flood <sup>2 3</sup>. Activities such as driving into, walking near, or engaging in recreational activities near or in floodwater are commonly reported as preceding drowning <sup>1</sup>. Reports have shown that, in Australia, around 53% of flood-related deaths and 55% of all river flood-related unintentional fatal deaths <sup>4</sup> were the result of driving into floodwaters. Another recent study surveyed more than 600 Australian river users and found 35.7% of participants reported having driven into floodwater, with males (43.9%) significantly more likely to have driven into floodwaters than females (27.8%) <sup>5</sup>. These drowning statistics also likely underestimate the true extent of the driving-related drownings due to limitations around the use of International Classification of Diseases (ICD) flood-related drowning codes <sup>6 7</sup>.

Due to the magnitude of this issue, intentionally driving into floodwater has been the subject of mass-media drowning prevention campaigns such as ‘Turn Around Don’t Drown’ <sup>8</sup> in the United States and ‘If it’s flooded, forget it’ <sup>9</sup> in Australia. However, very little research to date has evaluated the effect of these campaigns on attitudes, motivation, and actual drowning rates. In fact, fatal and non-fatal drownings resulting from intentionally driving into floodwater continue to occur regularly <sup>10-12</sup>. For example, during a severe weather event in a 24-hour period, in March 2017, 108 floodwater rescues were conducted in Queensland, Australia by the State Emergency Service <sup>13</sup>. This has resulted in a national call for research into behaviours around floodwater <sup>12</sup>.

In response to a paucity of empirical research, we conducted a series of studies to understand the psychological processes underpinning decisions around driving into floodwater <sup>14-16</sup>, avoiding driving into floodwater <sup>17</sup>, and the experiences of those who rescue drivers who have driven into floodwater <sup>18</sup>. While it is commonly assumed that people choose to drive into floodwater due to a lack of awareness of the risks, our research identified that many of the

people who drive into floodwater are aware of the risks and have been exposed to relevant mass-media campaigns <sup>14</sup>.

Building on this research, we developed and evaluated a mass-media style infographic video that included theory-based behaviour change methods to bridge the gap between awareness and intentions to drive into floodwater <sup>19</sup>. While the video had an effect on attitudes, subjective norm, perceived susceptibility, and perceived severity immediately post-intervention, these effects were only maintained at the four-week follow up for women and not men. Further, there was no effect of the video on intentions <sup>19</sup>. Therefore, continued development and evaluation of interventions aimed at promoting safe driving behaviour during floods is a priority. Some potential explanations for the null effect of the infographic on intentions are that the intervention did not directly target intentions and/or did not aid in the development of a plan that can be implemented if this particular situation arises for the person during a flood event (i.e. faced with a flooded road whilst in their vehicle). We also suspect that gender differences in the effects at follow-up may have been due to females self-reinforcing the messages contained within the intervention due to a greater tendency to utilise ruminative thinking styles <sup>20</sup>. This suggests that an effective intervention aimed at promoting safe driving behaviour during floods should utilise behaviour change methods that aid in the development of a plan and when to implement it, such as implementation intentions <sup>21</sup>; and, allow sufficient internalisation of the intervention content through strategies such as mental imagery <sup>22</sup>.

Implementation intentions are concrete plans about when, where, and how to enact a behaviour to achieve a specific goal which contrasts from simply intending to achieve a goal—otherwise known as goal intentions <sup>23</sup>. Implementation intentions have been found to be superior to goal intentions in achieving goals, with a meta-analysis finding medium to large effects of implementation intentions on goal achievement <sup>24</sup>. Conroy and Hagger <sup>22</sup> describe mental imagery interventions as involving “self-directed imagining or visualizing specific

events, actions, or outcomes, including concomitant feelings and responses, with the express purpose of increasing motivation toward a target action or task” (p. 669). Conroy and Hagger’s (2018) meta-analysis of imagery interventions in health behaviour found nontrivial small averaged corrected effects of these interventions on post-intervention behaviours, intentions, perceived control, and attitudes; and, identified characteristics of interventions that moderate the effect size. A small number of studies have combined implementation intentions and mental imagery to change health behaviours such as fruit and vegetable consumption <sup>25</sup> and alcohol intake <sup>26</sup> yielding small to medium effect sizes. In building upon our prior work <sup>19</sup>, we therefore seek to combine two behaviour change strategies—mental imagery and implementation intentions—to develop an *implementation imagery* intervention to promote less favourable intentions to drive into floodwater. Implementation imagery is an intervention procedure comprising imagery and planning exercises. Participants are prompted to imagine the steps required to engage in a future motivated behaviour and form a concrete plan to implement the steps. We propose a six-part implementation imagery intervention procedure for the proposed intervention aimed at avoiding driving into floodwater. In Part 1, participants will be provided with information on the target behaviour. In Part 2, participants will receive a persuasive communication prompting participants to form a goal to perform the target behaviour in the future. In Part 3, participants will be asked to complete a practice imagery exercise. In Part 4 respondents will be instructed to imagine the steps required for them to achieve the goal set in Part 2 and develop and specify a plan to follow the steps if they were to encounter floodwater while driving. In Part 5, participants will be prompted to imagine the outcomes associated with enacting the plan to highlight the personal relevance of the plan. In Part 6, participants will be provided with a final statement indicating when they should remember their plan.

## Objectives

Drawing on our previous research<sup>14-19</sup> we aim to develop a theory-based behavioural intervention to promote less favourable intentions of drivers to drive into floodwaters. The research will be conducted in two phases, a development phase in which the theory-based content of the implementation imagery intervention embedded in a survey will be developed and piloted, and an implementation and evaluation phase in which the effect of the intervention in changing intentions and beliefs with respect to driving into floodwaters, will be tested in a population of drivers using a randomised controlled design. Drivers recruited to the trial are randomly assigned to intervention or control conditions. Participants assigned to the implementation imagery condition receive a set of education-based messages that focus on changing attitudes and intentions with respect to driving into floodwaters, and the theory-based implementation imagery exercises. The control condition receives the education-based messages alone, which are drawn from information commonly disseminated by public safety organisations. This represents a “usual care” control condition. Specifically, the objectives of the current study are to: (a) test the effectiveness of the intervention administered after baseline measures of study constructs at Time 1 (T1) in changing drivers’ intentions and beliefs immediately post-intervention at Time 2 (T2); (b) determine whether the effects of the intervention are maintained four weeks later at Time 3 (T3); compare the effects of the intervention to effects of a comparison condition comprising publicly available education on driving into floodwater; and, (d) examine gender differences in intervention effects at T2 and T3.

We hypothesise that drivers assigned to the intervention condition will report significantly lower intentions to drive through floodwater, relative to the control condition immediately post-intervention at T2 (primary outcome; Hypothesis 1). With regard to the secondary outcomes, we hypothesise that drivers assigned to the intervention condition will report significantly less favourable attitudes and reduced perceived social pressure to drive

Running head: FLOODWATER DRIVING IMAGERY INTERVENTION PROTOCOL 7

through floodwater, as well as greater perceptions of behavioural control, risk perception, perceived susceptibility, perceived severity, and anticipated regret toward driving through floodwater, relative to the control condition immediately post-intervention at T2 (Hypothesis 2). We further hypothesise that that drivers assigned to the intervention condition will report significantly greater barrier self-efficacy and action planning regarding avoiding driving through floodwater, relative to the control condition immediately post-intervention at T2 (Hypothesis 3). We also expect that the effects of the intervention will be maintained four-weeks later at T3 (Hypothesis 4). Given our previous research has identified gender differences in changing beliefs <sup>19</sup>, we will also test for sex differences in the effects of the intervention on study outcomes.

**Methods and Analysis**

The study protocol is reported in accordance with SPIRIT Statement standard protocol items for clinical trials <sup>27 28</sup>.

**Intervention Development and Optimisation**

The intervention content was developed based on existing safety messages <sup>9</sup>, our prior research <sup>14 17</sup>, behaviour change methods <sup>29</sup>, and best-practice techniques for implementation intentions and mental imagery <sup>22</sup>. Prior to recording, the scripts were reviewed by a panel of experts in drowning prevention, behaviour change, and media and communication. The scripts were also piloted with two Australian drivers and feedback was invited. Based on initial expert and driver feedback, refinements to wording of the scripts were made. The scripts were then audio-recorded using a voiceover actor and developed into videos. The videos then underwent further expert review and piloting with seven drivers from the target population. The pilot involved the participants completing the T1 survey, the intervention, the T2 survey, and then a semi-structured interview where they were asked broadly about their thoughts regarding the exercises. The participants were probed for specific information regarding clarity and timing of the different exercises in the video if it was not already shared. The drivers were purposively

recruited to ensure a range on key demographic factors of age, sex, and education level. Based on qualitative feedback provided by pilot participants, we made data-driven refinements to the presentation and timing allocated to the exercises.

### Patient and Public Involvement

Patient and public involvement in the development of the intervention was conducted through our prior research which involved qualitative interviews with members of the target population<sup>14 17</sup>—Australian drivers—and through piloting of the intervention materials with Australian drivers. Specifically, drivers' descriptions of the behaviour informed the wording of the items used in the outcome measures. Drivers' descriptions from these studies also informed the content of the intervention. The research questions were developed around evaluating the effect of the intervention on psychological constructs that have been found to predict willingness to drive through floodwater in prior research<sup>15 16</sup>. Drivers will not be involved in the recruitment or conduct of the study. Participants will be provided with the contact details of the research team on the study information sheet and will be informed that they can contact the research team if they wish to receive the results of the study. The burden of participating will be assessed by the drivers after having read the study information and prior to provision of informed consent.

### Study Design

The intervention will be evaluated against the control condition immediately post-intervention (T2) and four-weeks later (T3). The evaluation will adopt a 2 (intervention condition: education and implementation intention imagery condition vs. education only condition) x 3 (time: T1, T2, T3) parallel group randomised controlled design. Figure 1 illustrates the design of the intervention and participant flow through the study.

INSERT FIGURE 1 HERE

**Setting and Participant Recruitment**

The randomised controlled trial will be conducted using an online survey tool (Qualtrics™). Participants will be eligible if they hold a valid full driver’s licence, are an Australian resident, and are the only member of their household participating in the study. Participants will be recruited using a research panel provider and screened by the provider before entering the trial. In addition to the inclusion criteria, participants will be screened on the following demographic characteristics and quotas will be imposed to ensure that the sample comprises similar proportions of these characteristics to the distribution of flood-related transport deaths in the general population: age, sex, geographic region (by state and metropolitan vs. rural), and household income. The study will adopt a double-blind procedure. Participants will be unaware of the condition to which they have been assigned and study purpose. Staff at the research panel company who may have direct contact with the participants will also be unaware of the conditions and purpose of the study.

**Data Quality**

Two questions will be embedded within the T1 survey to assess attentive responding<sup>30</sup>  
<sup>31</sup>. The questions instruct the choice of a particular answer so that it is not possible to answer the question incorrectly if the item is read carefully (e.g., “please choose option two to ensure you are paying attention”). Participants who do not answer both of the items correctly will be excluded.

**Randomisation**

Randomisation into one of the two groups will be conducted by the Qualtrics randomizer feature following the T1 survey. The Qualtrics randomizer operates using a Mersenne Twister pseudorandom number generator. The Mersenne Twister is the default pseudorandom number generator for a range of widely used software packages including Microsoft Excel and SPSS. By nature of this method of random assignment, the sequence cannot be determined until the participant is assigned.

## Intervention Condition

Participants will be initially presented with a brief information sheet outlining study expectations and participant rights prior to completing an informed consent form. They will then watch a brief 'welcome' video to familiarise participants with the voice of the narrator, and to give participants the opportunity to enable the audio on their device prior to commencing the intervention. Next, participants will complete the T1 (pre-intervention) questionnaire, after which they will be randomised into one of two conditions (see Figure 1 for trial design). Both groups will watch the welcome video; however, the welcome video for the control group does not make reference the mental imagery activity. The intervention group will receive the following six-part procedure, while the control group will receive only Part 1. Participants are then directed to the T2 survey. See Supplementary Material A for video scripts. The intervention is structured such that participants receive information, then form a goal intention, and then go on to make a plan. After imagining their plan and noting it down, participants are instructed to imagine the outcomes associated with enacting their plan to highlight personal relevance. The intervention utilises a range of behaviour change methods<sup>29</sup>, which have been mapped on to theoretical constructs that comprise the study outcomes (see Table 1).

**Part 1: Education.** The first video is designed to educate participants on the risks of driving into floodwater. It has been composed based on information that is publicly available and commonly broadcasted in Australia.

**Part 2: Formation of a goal intention.** The second video is designed to encourage participants to form a goal intention to avoid driving into floodwater if they encounter it on their route and to indicate that by forming a plan of what do in this situation, they can achieve their goal and avoid driving into floodwater. The video contains visuals of rain, floodwater, and a floodwater damaged road, and drivers are provided with further information about why people driver into floodwater drawn from our prior research<sup>14 17</sup>. Following Part 2, participants

will complete a single-item measure of goal intention, indicating their commitment to the goal (See Supplementary Material B for question details).

**Part 3: Practice imagery exercise.** Prior to the process imagery exercise, participants are provided with a practice guided imagery exercise. The purpose of the exercise is to allow participants to familiarise them with the practice of imagery, and to get them to relax and begin visualising vivid images. The practice guided imagery exercise prompts participants to imaging cutting into a lemon with a knife. The exercise uses a familiar situation in order to facilitate imagery.

**Part 4: Process imagery exercise.** Following the practice exercise, participants are provided with some examples of safe options to take should they encounter floodwater on their route. Participants are then instructed to imagine approaching floodwaters while driving their car and consider the steps they could take to avoid driving into the floodwater. Participants are then instructed to visualise these scenes independently for approximately two minutes. After the exercise is complete, the narrator advises the participant that the activity is over and requests that they note down the plan that they imagined in a response box below the video.

**Part 5: Outcome imagery exercise.** Participants watch a video which guides them through an outcome imagery exercise. This involves imagining the outcomes that may occur if they drive into floodwater, followed by a range of outcomes that would occur if they do not drive into floodwater. After the exercise is complete, the narrator advises the participant that the activity is over and requests that they note down the things they imagined in the space below the video.

**Part 6: Conclusion.** Following the final imagery exercise, participants watch a video thanking them for their attention and reminding them that if they are ever in the imagined situation, to remember their goal. The purpose of this is to create a cue that may be triggered by a situation similar to that imagined during the intervention.

**Imagery fidelity.** Fidelity of the imagery intervention will be assessed using four items modified from Knäuper, et al.<sup>25</sup>. The items assess vividness, clarity, detail, and ease of imagery on 7-point scales (e.g., “How CLEAR was the mental image that you had of yourself avoiding driving through the floodwater?”). The 7-point scales vary for each item and are described in Supplementary Material B.

### **Control Condition**

Participants in the control group will receive the Part 1: Education video and will then then be directed to the T2 survey. This active control condition was chosen as the comparator to allow the effect of the imagery intervention to be examined above and beyond the effect of simply providing information about the behaviour.

### **Outcomes**

**Psychological measures.** Participants will complete measures of psychological constructs from two social-cognitive theories: the theory of planned behaviour<sup>32</sup> and the health action process approach<sup>33</sup>. These theories were selected because they have used to identify the psychological determinants of a range of health and safety behaviours<sup>34 35</sup>. The psychological constructs will be measured on multi-item psychometric instruments developed using standardised guidelines (e.g., Ajzen, 2006<sup>36</sup>)<sup>a</sup>. While we discuss the behaviour in this study as “driving into floodwater” because by nature there is no certainty around a driver making it through, we measure the behaviour using the wording “driving through floodwater”. This is based on our prior qualitative work where participants most commonly described the behaviour in this way<sup>14 17</sup>. The self-report psychological measures will be administered at T1, T2 and T3. See Supplementary Material B for all measures used in the study.

**Intention.** Intention to drive through floodwater will be measured using four items (e.g., “I intend to drive through the floodwater”). Responses are provided on 7-point scales (1 =

---

<sup>a</sup> All scales measuring social-cognitive constructs except action planning and perceived behavioural control have been used in our previous study<sup>19</sup>, exhibiting good internal consistency.

*strongly disagree* and 7 = *strongly agree*). Change in intention is the primary outcome in the study. The following outcomes are secondary outcomes.

**Attitudes.** Attitudes towards driving through floodwater will be assessed using five items preceded by the common stem: “If I were to drive through the floodwater, it would be” Responses will be provided on semantic differential scales (e.g., 1 = *bad* and 7 = *good*).

**Subjective norm.** Subjective norm will be measured using five items prompting participants to rate the extent to which important others would want them to drive through floodwater and whether people similar to them would drive through (e.g., “Most people who are important to me would approve of me driving through the floodwater”). Responses are provided on 7-point scales (1 = *strongly disagree* and 7 = *strongly agree*).

**Perceived behavioural control.** Perceived behavioural control will be measured using three items assessing drivers’ perceptions of their ability to control the behaviour (e.g., “I have complete control over whether I drive through the floodwater”). Responses are provided on 7-point scales (1 = *strongly disagree* and 7 = *strongly agree*).

**Risk perception.** Risk perception will be measured using a two-item scale (e.g., “It would be risky for me to drive through the floodwater”). Responses are provided on 7-point scales (1 = *strongly disagree* and 7 = *strongly agree*).

**Perceived susceptibility.** Perceived susceptibility will be measured using a three-item scale (e.g., “My chances of having trouble if I drive through the floodwater are great”). Responses are provided on 7-point scales (1 = *extremely unsusceptible* and 7 = *extremely susceptible*).

**Perceived severity.** Perceived severity will be measured using a two-item scale (e.g., “If I drive through the floodwater, the consequences would be...”). Responses are provided on 7-point scales (1 = *not at all severe* and 7 = *extremely severe*).

**Anticipated regret.** Anticipated regret will be measured using a three-item scale (e.g., “If I were to drive through the floodwater, I would feel regret”. Responses are provided on 7-point scales (1 = *strongly disagree* and 7 = *strongly agree*).

**Barrier self-efficacy.** Barrier self-efficacy will be measured using nine items assessing drivers’ confidence to avoid driving through floodwater (e.g., “I am confident I can avoid driving through floodwaters in the future... even when the alternative route will take more time/is inconvenient”. Responses are provided on 7-point scales (1 = *strongly disagree* and 7 = *strongly agree*). The barrier self-efficacy items were developed using belief elicitation in our prior work <sup>17</sup> with a sample of drivers who had avoided driving into floodwater when they encountered it on their route.

**Action planning.** Action planning will be measured on a four-item scale (e.g., “I have made a plan regarding... How to avoid driving through floodwater”). Responses are provided on 7-point scales (1 = *not at all true* and 7 = *exactly true*).

**Covariates.** Consistent with the approach taken in our prior work <sup>19</sup>, a number of demographic variables will be measured and used as covariates in the analyses. Goal intention and imagery ability will also be measured and used as covariates.

**Demographic and other background factors.** Demographic and background details are collected at T1 including: (i) gender (0 = *male* and 1 = *female*); (ii) age (in years); (iii) relationship status (0 = *not married* and 1 = *married*); (iv) education level (0 = *non-university* and 1 = *university*); (v) number of years driving; (vi) number of children; and (vii) past frequency of driving through floodwater measured using a single item: “How often in the past 5 years have you driven through floodwater? ‘Floodwater’ refers to a body of water covering land that is normally dry”, with responses provided on a 7-point scale (1 = *never* and 7 = *very often*).

**Goal intention.** Following Parts 1 and 2 of the intervention (or Part 1 for the control group), participants will be asked a question to assess their willingness to form a goal to avoid

driving into floodwater, “Now that you have heard some information about driving into floodwater, please indicate your agreement with the following statement: I am willing to form a goal to avoid driving through floodwater”, responses provided on a 7-point scale (1 = *strongly disagree* and to 7 = *strongly agree*).

**Imagery ability.** Individual differences in imagery ability will be measured using a 10-item scale drawn from the International Personality Item Pool (IPIP) <sup>37</sup> and designed to measure Factor V (Intellect and Imagination) of Goldberg’s Big-Five Factor Markers <sup>38</sup>. Responses provided on 5-point scales (1 = *very inaccurate* and 5 = *very accurate*). For example, “Typically, I... Have a vivid imagination”.

**Power analysis.** An *a priori* power analysis is conducted using G\*Power v3.1 for an ANCOVA model estimating fixed effects, main effects, and interactions. The effect size was set to  $f = .25$  (corresponding to the effect size of intention from pre- to post-intervention in Hamilton et al., 2018 <sup>19</sup>) to detect a medium effect, with power set at .95 and alpha set at .01 (adjusted to protect from inflation of type I error rate due to multiple tests). Inclusion of nine covariates was also specified. The analysis yielded a total minimum required sample size of 289. We aim to recruit 460 participants at the baseline in order to meet our target sample size of 300 participants at the follow-up (allowing for up to 35% attrition). Recruitment of will cease when 460 participants have participated in the baseline.

**Statistical analysis.** Hypotheses will be tested using a series of mixed-model ANCOVAs. In the analyses, condition/group will be a between-participants variable; Time (T1, T2, T3) will be a within-participants variable; and the primary outcome (intention) and secondary outcomes (attitudes, subjective norm, perceived behavioural control, risk perception, perceived susceptibility, perceived severity, anticipated regret, barrier self-efficacy, action planning) will be separate dependent variables. Consistent with the approach taken in our prior work <sup>19</sup>, demographic variables (gender, age, relationship status, educational level, number of years driving, number of children, and past frequency of driving through floodwaters) will be

included as covariates in the analyses. Mental imagery ability and goal intention will also be included as covariates. Where an ANCOVA indicates that there is a significant time\*group interaction for any of the outcome variables, simple effects analyses using estimated marginal means will be conducted for that outcome. Specifically, we will compare within-group differences in the outcome between time points, and between-group differences in the outcome at each time point. Alpha will be set at .01 for all analyses (adjusted to protect from inflation of type I error rate due to multiple tests). Missing data will be imputed using the Expectation-Maximisation (E-M) algorithm.

### **Ethics and Dissemination**

Ethical approval for the study has been granted by the Griffith University Human Research Ethics Committee (GU ref no: 2017/895). We anticipate that the rigorous development and piloting process will ensure that no amendments to the protocol are required. However, if any amendments are required, they will be submitted as amendments to the Australian New Zealand Clinical Trials Registry record and reported in the final report of the study. We do not anticipate any risks greater than daily living to be involved with participation in this project, and no discomfort or adverse effects were reported by participants in the pilot study. However, participants are provided with the following information: “should you experience any discomfort due to undertaking this survey, Lifeline (13 11 14) offers a free 24-hour telephone counselling service”.

**Informed consent.** Before being presented with the online baseline survey, participants are presented with the study information sheet. The information sheet indicates that proceeding to the next page and commencing participation will be considered consent to participate. Participants are also advised in the information sheet that they are free to cease participation at any time without comment or penalty. See Supplementary Material C for informed consent materials.

**Confidentiality.** Participants will be recruited by a research panel provider and directed to an online Qualtrics survey to participate in the study. The research panel provider does not have access to participant responses, which are accessible only by members of the research team. The research team match responses using a code identifier, and the code identifier of those who complete the baseline are provided to the research panel provider to invite participants to complete the follow-up. The research team do not have access to the identities of participants.

**Data deposition.** Prior to publication of the results, data will be stored securely on Qualtrics and then the Griffith University Google Drive or OneDrive allocation and will be accessible only by authors K.H and J.J.K. Once data collection is complete, the data will be transferred to author M.S.H. Given the restrictions on access to the data, a data monitoring committee will not be required. Following publication, deidentified data and statistical code will be made available on Open Science Framework.

**Dissemination.** The findings are presented in the form of peer-reviewed journal articles and industry reports and presented at scientific conferences. The authors of this protocol will author publications arising from this trial. Media releases and public statements about the research are also made to disseminate the findings to the general public. The findings are also made available to participants if requested. Contact details and procedure for requesting the results are made available in the study information sheet. Trial materials are made available on Open Science Framework following publication of the results.

**Discussion**

The purpose of the current project is to evaluate the effectiveness of a theory-based intervention using implementation imagery to change drivers’ intentions to drive into floodwaters. The intervention will be delivered online using a survey tool containing a series of infographic videos that present intervention messages. Participants will be randomised to an intervention condition or a control condition. The videos presented to participants assigned to

the intervention condition will comprise a series of educational messages about the risks of driving into floodwater and an exercise using implementation imagery. The videos presented to participants assigned to the control condition will comprise the education messages only. The primary outcome variable will be intentions to drive into floodwater, and secondary outcomes will be theory-based constructs identified as important determinants of intentions to drive into floodwater in our previous research (provide references).

Driving into floodwaters is a high-risk behaviour that can be fatal. Reducing drownings from risky aquatic activities during floods has been identified as a priority in the Australian Water Safety Strategy 2016-2020<sup>12</sup>. Strategies that change drivers' behaviour around floodwater should be at the forefront of efforts to reduce drivers' propensity to drive into floodwaters. The present intervention examines whether a behavioural intervention will be effective in changing driver's intentions drive into floodwater. The intervention has been developed with a focus on effectiveness and potential feasibility. In terms of effectiveness, the intervention is based on psychological theories of attitudes, motivation and decision making, consistent with research indicating that effective behaviour change necessitates a fundamental understanding of behaviour, and that theory-based interventions can lead to more effective and efficient interventions. The intervention content is based on formative research identifying the determinants of risky behaviour when driving in floods and into floodwaters and is designed to target change in behaviour through change in those determinants. In terms of feasibility, the intervention has been designed to be delivered online and uses accessible infographic videos co-designed by researchers and stakeholders. The exercises contained in the videos are designed to be brief and cost-effective, reducing response burden, and maximising the likelihood of engagement. If found to be effective, translation of the intervention into practice will be facilitated by these design features. The brief, online design means it could be incorporated in websites and disseminated through programs such as learner driver education

and during media campaigns during floods with minimal requirement for modification and at relatively low cost. It also paves the way for larger scale usability and feasibility trials.

The intervention will also make a contribution to theory. The current intervention adopts behaviour change strategies that target key theoretical determinants demonstrated to be related to risky driving behaviours around floodwater (reference our and others work). We expect our test of the intervention to contribute to the evidence base of effective methods for changing behaviour. Such evidence is important in order to identify the components of behaviour change interventions that are effective in promoting behaviour change and contributes to more effective and optimally efficient interventions.

A key strength of the study is that it uses a sample with key demographic characteristics proportional to the distribution of flood-related transport deaths in the Australian population, ensuring results are generalisable. While the outcomes are an extensive range of psychological variables established to predict driving into floodwater, the unpredictable and infrequent occurrence of flood events means that examining the effect of our intervention on actual behaviour is not feasible within the timeframe of the study. A limitation of the study is therefore that the primary outcome is behavioural intentions rather than behaviour. The paucity of high-quality theory-based intervention research is not unique to driving into floodwater. For example, for another behaviour that carries high risk of drowning, alcohol use during aquatic activities, there has not been any intervention research in more than two decades <sup>39</sup>. If effective, this type of intervention and mode of delivery may be developed and applied to other water safety behaviours with the potential to reduce drowning.

## References

1. World Health Organization. Global report on drowning: Preventing a leading killer Geneva, Switzerland. 2014 [cited 2018 Apr 25]. Available from: [http://www.who.int/violence\\_injury\\_prevention/publications/drowning\\_global\\_report/Final\\_report\\_full\\_web.pdf](http://www.who.int/violence_injury_prevention/publications/drowning_global_report/Final_report_full_web.pdf).
2. Di Mauro M, De Bruijn KM, Meloni M. Quantitative methods for estimating flood fatalities: towards the introduction of loss-of-life estimation in the assessment of flood risk. *Natural Hazards* 2012;1-31. doi: 10.1007/s11069-012-0207-4
3. Jonkman S. Loss of life due to floods: General overview. In: Bierens J, ed. Drowning. Berlin, Germany: Springer 2014:957-65.
4. Peden AE, Franklin RC, Leggat P, et al. Causal pathways of flood related river drowning deaths in Australia. *PLOS Currents Disasters* 2017 doi: 10.1371/currents.dis.001072490b201118f0f689c0fbe7d437
5. Peden AE, Franklin RC, Leggat P. The flood-related behaviour of river users in Australia. *PLOS Currents Disasters* 2018;Jun 14. Edition 1 doi: 10.1371/currents.dis.89e243413a0625941387c8b9637e291b
6. Peden AE, Franklin RC, Leggat PA. Fatal river drowning: the identification of research gaps through a systematic literature review. *Inj Prev* 2016 doi: 10.1136/injuryprev-2015-041750
7. Peden AE, Franklin RC, Mahony AJ, et al. Using a retrospective cross-sectional study to analyse unintentional fatal drowning in Australia: ICD-10 coding-based methodologies verses actual deaths. *BMJ Open* 2017;7(12) doi: 10.1136/bmjopen-2017-019407
8. National Oceanic and Atmospheric Administration. Turn Around Don't Drown Silver Spring, MD. 2011 [cited 2018 Apr 25]. Available from: <http://www.nws.noaa.gov/os/water/tadd/>.
9. Queensland Floods Commission of Inquiry. Queensland floods commission of inquiry: final report. Brisbane, Australia. 2012 [cited 2018 Apr 25]. Available from: [http://www.floodcommission.qld.gov.au/\\_data/assets/pdf\\_file/0007/11698/QFCI-Final-Report-March-2012.pdf](http://www.floodcommission.qld.gov.au/_data/assets/pdf_file/0007/11698/QFCI-Final-Report-March-2012.pdf) accessed Apr 25 2018.
10. Peden AE, Franklin RC, Leggat PA. The hidden tragedy of rivers: A decade of unintentional fatal drowning in Australia. *PLoS ONE* 2016;11(8):e0160709. doi: 10.1371/journal.pone.0160709
11. Royal Life Saving Society - Australia. Royal Life Saving National Drowning Report 2016 Sydney, Australia. 2016 [cited 2018 Apr 25]. Available from: [https://www.royallifesaving.com.au/\\_data/assets/pdf\\_file/0004/18085/RLS\\_NDR2016\\_ReportLR.pdf](https://www.royallifesaving.com.au/_data/assets/pdf_file/0004/18085/RLS_NDR2016_ReportLR.pdf).
12. Australian Water Safety Council. Australian Water Safety Strategy 2016-2020. Sydney, Australia: Australian Water Safety Council, 2016.
13. Royal Automobile Club of Queensland; RACQ. More than 100 floodwater rescues: If it is flooded, forget it: Royal Automobile Club of Queensland; 2017 [cited 2018 Apr 25]. Available from: <https://live.racq.com.au/2017/03/100-floodwater-rescues-flooded-forget/> accessed July 5th 2017.
14. Hamilton K, Peden AE, Keech JJ, et al. Deciding to drive through floodwater: A qualitative analysis through the lived experience. Royal Life Saving Society – Australia & Griffith University. 2016 [cited 2018 Apr 25]. Available from: <http://doi.org/10.4225/01/5aa21363c374a>.
15. Hamilton K, Peden AE, Pearson M, et al. Stop there's water on the road! Identifying key beliefs guiding people's willingness to drive through flooded waterways. *Safety Science* 2016;89:308-14. doi: 10.1016/j.ssci.2016.07.004

16. Pearson M, Hamilton K. Investigating driver willingness to drive through flooded waterways. *Accid Anal Prev* 2014;72:382-90. doi: 10.1016/j.aap.2014.07.018
17. Hamilton K, Price S, Keech JJ, et al. Drivers' experiences during floods: Investigating the psychological influences underpinning decisions to avoid driving through floodwater. *International Journal of Disaster Risk Reduction* 2018;28:507-18. doi: 10.1016/j.ijdrr.2017.12.013
18. Keech JJ, Smith SR, Peden AE, et al. The lived experience of rescuing people who have driven into floodwater: Understanding challenges and identifying areas for providing support. *Health Promot J Austr* 2018 doi: 10.1002/hpja.181
19. Hamilton K, Peden AE, Keech JJ, et al. Changing people's attitudes and beliefs toward driving through floodwaters: Evaluation of a video infographic. *Transportation Research Part F: Traffic Psychology and Behaviour* 2018;53:50-60. doi: 10.1016/j.trf.2017.12.012
20. Johnson DP, Whisman MA. Gender differences in rumination: A meta-analysis. *Personality and Individual Differences* 2013;55(4):367-74. doi: 10.1016/j.paid.2013.03.019
21. Hagger MS, Luszczynska A, de Wit J, et al. Implementation intention and planning interventions in Health Psychology: Recommendations from the Synergy Expert Group for research and practice. *Psychol Health* 2016;31(7):814-39. doi: 10.1080/08870446.2016.1146719
22. Conroy D, Hagger MS. Imagery interventions in health behavior: A meta-analysis. *Health Psychol* 2018;37(7):668-79. doi: 10.1037/hea0000625 [published Online First: 2018/05/29]
23. Gollwitzer PM. Implementation intentions: Strong effects of simple plans. *Am Psychol* 1999;54(7):493.
24. Gollwitzer PM, & Sheeran, P. Implementation intentions and goal achievement: a meta-analysis of effects and processes. *Advances in Experimental Social Psychology* 2006;38:69-119. doi: 10.1016/S0065-2601(06)38002-1
25. Knäuper B, McCollam A, Rosen-Brown A, et al. Fruitful plans: Adding targeted mental imagery to implementation intentions increases fruit consumption. *Psychol Health* 2011;26(5):601-17. doi: 10.1080/08870441003703218
26. Hagger MS, Lonsdale A, Koka A, et al. An intervention to reduce alcohol consumption in undergraduate students using implementation intentions and mental simulations: A cross-national study. *International Journal of Behavioral Medicine* 2012;19(1):82-96. doi: 10.1007/s12529-011-9163-8
27. Chan A-W, Tetzlaff JM, Gøtzsche PC, et al. SPIRIT 2013 explanation and elaboration: guidance for protocols of clinical trials. *BMJ : British Medical Journal* 2013;346 doi: 10.1136/bmj.e7586
28. Chan A, Tetzlaff JM, Altman DG, et al. Spirit 2013 statement: Defining standard protocol items for clinical trials. *Ann Intern Med* 2013;158(3):200-07. doi: 10.7326/0003-4819-158-3-201302050-00583
29. Kok G, Gottlieb NH, Peters G-JY, et al. A taxonomy of behaviour change methods: an Intervention Mapping approach. *Health Psychology Review* 2016;10(3):297-312.
30. Schroder HS, Dawood S, Yalch MM, et al. Evaluating the domain specificity of mental health-related mind-sets. *Social Psychological and Personality Science* 2016;7(6):508-20. doi: 10.1177/1948550616644657
31. Maniaci MR, Rogge RD. Caring about carelessness: Participant inattention and its effects on research. *Journal of Research in Personality* 2014;48:61-83. doi: 10.1016/j.jrp.2013.09.008
32. Ajzen I. The Theory of Planned Behavior. *Organ Behav Hum Decis Process* 1991;50(2):179-211. doi: 10.1016/0749-5978(91)90020-T

33. Schwarzer R. Modeling health behavior change: How to predict and modify the adoption and maintenance of health behaviors. *Applied Psychology* 2008;57(1):1-29. doi: 10.1111/j.1464-0597.2007.00325.x
34. McEachan RRC, Conner M, Taylor NJ, et al. Prospective prediction of health-related behaviours with the Theory of Planned Behaviour: a meta-analysis. *Health Psychology Review* 2011;5(2):97-144. doi: 10.1080/17437199.2010.521684
35. Zhang C, Zhang, R., Schwarzer, R., & Hagger, M. S. A meta-analysis of the health action process approach. *Pre-Print Available on PsyArXiv May 29 2018* doi: 10.31234/osf.io/4pc27
36. Ajzen I. Constructing a theory of planned behavior questionnaire, 2006.
37. Goldberg LR. A broad-bandwidth, public domain, personality inventory measuring the lower-level facets of several five-factor models. In: Mervielde I, Deary I, De Fruyt F, et al., eds. *Personality Psychology in Europe*. Tilburg, The Netherlands: Tilburg University Press 1999:7-28.
38. Goldberg LR. The development of markers for the Big-Five factor structure. *Psychol Assess* 1992;4(1):26. doi: 10.1037/1040-3590.4.1.26
39. Hamilton K, Keech JJ, Peden AE, et al. Alcohol use, aquatic injury, and unintentional drowning: A systematic literature review. *Drug Alcohol Rev* 2018 doi: 10.1111/dar.12817

**Authors’ contributions** K.H, A.E.P, and M.S.H conceptualised the study. K.H, J.J.K, and M.S.H designed the study. M.S.H will conduct the data analysis, and K.H and M.S.H will interpret the findings. K.H and J.J.K drafted the manuscript with revisions provided by A.E.P and M.S.H. All authors reviewed and approved the final manuscript as submitted.

**Funding** The study is supported by a Royal Life Saving Society - Australia and Menzies Health Institute Queensland industry partnership grant. The sponsors have no role in the design, methods, participant recruitment, data collection, analysis, interpretation, preparation of this manuscript, or the decision to submit this article for publication, and they do not have ultimate authority over any of these activities.

**Acknowledgements** Martin S. Hagger’s contribution was supported by a Finland Distinguished Professor (FiDiPro) award (Dnro 1801/31/2105) from Business Finland. This research is supported by Royal Life Saving Society – Australia. The drowning prevention research of Royal Life Saving Society – Australia is supported by the Australian Government. We would like to thank Kevin Judge (Senior Technical Officer – Health, Griffith University) for recording and producing the videos that will deliver the intervention and control condition stimuli. We would also like to thank the drivers who assisted with the pilot of intervention materials.

**Competing interests** Author A.E.P is employed by Royal Life Saving Society – Australia and affiliated with the College of Public Health, Medical and Veterinary Sciences, James Cook University, Townsville, Australia. Intervention development, data collection and analysis, and interpretation of findings is conducted independent of author A.E.P and Royal Life Saving Society – Australia.

**Ethics approval** The study protocol was approved by the Griffith University Human Research Ethics Committee (GU ref no: 2017/895).

**Data sharing statement** Data will be available following publication of the results at [osf.io/z7xph/](https://osf.io/z7xph/)

Table 1

*Behaviour change methods, targeted theoretical constructs, and implementation strategies.*

| Part                             | Behaviour change method/s                                                                                          | Implementation strategy                                                                                                                                                                                                                                     | Target construct                                                                                                                                                               |
|----------------------------------|--------------------------------------------------------------------------------------------------------------------|-------------------------------------------------------------------------------------------------------------------------------------------------------------------------------------------------------------------------------------------------------------|--------------------------------------------------------------------------------------------------------------------------------------------------------------------------------|
| 1: Education                     | Information provision                                                                                              | Provide information about the risks of driving into floodwater                                                                                                                                                                                              | Attitudes, risk perception, perceived severity, perceived susceptibility                                                                                                       |
| 2: Formation of a goal intention | Personalise risk<br>Scenario-based risk information<br>Provide opportunities for social comparison<br>Goal setting | Providing information about the personal risk; providing reasons people commonly drive into floodwater from prior studies; providing a strategy for overcoming barriers to avoiding driving into floodwater                                                 | Intention, attitudes, subjective norm, perceived behavioural control, risk perception, perceived severity, perceived susceptibility, anticipated regret, barrier self-efficacy |
| 3: Practice imagery exercise     | Guided practice (imagery skill)                                                                                    | Tangy lemon guided imagery task                                                                                                                                                                                                                             | Not applicable                                                                                                                                                                 |
| 4: Process mental simulation     | Implementation intentions<br>Goal setting<br>Planning coping responses<br>Guided practice<br>Using imagery         | Provide examples of things to do when floodwater is encountered; imagining the steps to use when encountering floodwater while driving; process mental simulation exercise                                                                                  | Intention, perceived behavioural control, barrier self-efficacy, action planning                                                                                               |
| 5: Outcome mental simulation     | Personalise risk<br>Information about others' approval<br>Provide contingent rewards<br>Using imagery              | Encouragement to think about the things that can happen when driving into floodwater and when avoiding driving into floodwater, including the risk and the benefits. Information about what important others will think; outcome mental simulation exercise | Intention, attitudes, subjective norm, perceived behavioural control, risk perception, perceived severity, perceived susceptibility, anticipated regret                        |
| 6: Conclusion                    | Cue altering                                                                                                       | Instructing that if ever in the situation to remember goal                                                                                                                                                                                                  | Barrier self-efficacy                                                                                                                                                          |

Note: Part 3 refers to the practice task which is designed to build imagery ability and does not relate to a target construct being assessed.

**Figure Legend**

Figure 1. Randomised controlled trial design and participant progression through the study.

For peer review only

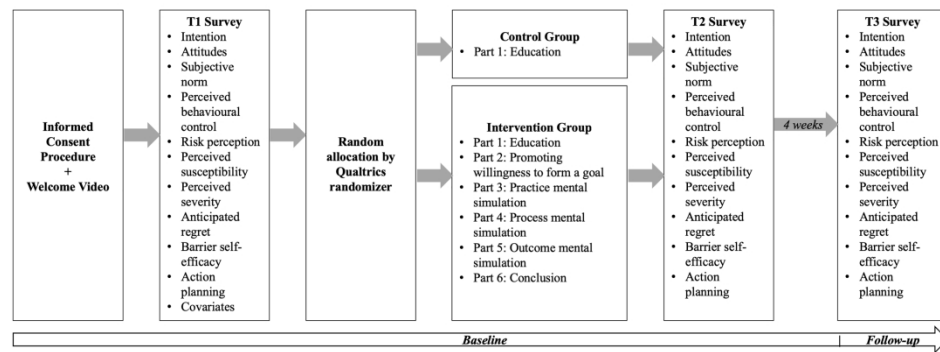

Figure 1. Randomised controlled trial design and participant progression through the study.

338x190mm (300 x 300 DPI)

Supplementary Material A – Mental Imagery Video Scripts

Note: The intervention group receives all of the below material. The control group receives the material indicated\*. Italicised text is displayed on screen in addition to being read aloud.

Welcome to the Study Video\*

| Audio                                                                                                                                                                                                                                                                                                                                                                                                                                                                                                    | Video        |
|----------------------------------------------------------------------------------------------------------------------------------------------------------------------------------------------------------------------------------------------------------------------------------------------------------------------------------------------------------------------------------------------------------------------------------------------------------------------------------------------------------|--------------|
| <p>Welcome to the study. Now that you have read through the study information and agreed to participate, I'd like to quickly recap what participating in the study today will involve. <i>First, there is a short survey for you to complete on the computer. Then, I will be back to guide you through some video exercises. Finally, I will leave you with another short survey to complete on the computer.</i></p> <p>Please now click to progress to the next page where the survey will begin.</p> | Neutral grey |

Introduction to Activity Video

| Intervention Group Audio                                                                                                                                                                                                                                                                                                                                                                                                                                                                                                                                                                                                                                                                                                                                                                                    | Control Group Audio*                                                                                                                                                                                                                                                                                                                                                                                             | Video        |
|-------------------------------------------------------------------------------------------------------------------------------------------------------------------------------------------------------------------------------------------------------------------------------------------------------------------------------------------------------------------------------------------------------------------------------------------------------------------------------------------------------------------------------------------------------------------------------------------------------------------------------------------------------------------------------------------------------------------------------------------------------------------------------------------------------------|------------------------------------------------------------------------------------------------------------------------------------------------------------------------------------------------------------------------------------------------------------------------------------------------------------------------------------------------------------------------------------------------------------------|--------------|
| <p>Thank you for answering those questions. For the next 10 or so minutes,<br/>I am going to guide you through a video.</p> <p>In the video, I am going to provide you with some information about driving during flood events.</p> <p>I am then going to guide you through some mental imagery exercises. In the exercises. In the exercises I will ask you to visualise several scenes in your mind.</p> <p>We will begin with a general imagery exercise to get you used to the idea and how it feels, and we will then turn to some exercises related to avoiding driving into floodwater.</p> <p>Before we start, I would like you to make yourself comfortable and to make sure you are free from distractions. When you are comfortable and ready to begin, please click to play the next video.</p> | <p>Thank you for answering those questions.</p> <p>I am going to guide you through a video.</p> <p>In the video, I am going to provide you with some information about driving during flood events.</p> <p>Before we start, I would like you to make yourself comfortable and to make sure you are free from distractions. When you are comfortable and ready to begin, please click to play the next video.</p> | Neutral grey |

**Part 1: Education\***

| Audio                                                                                                                                                                                                                                                                                                                                                                                                                                                                                                                                                                      | Video        |
|----------------------------------------------------------------------------------------------------------------------------------------------------------------------------------------------------------------------------------------------------------------------------------------------------------------------------------------------------------------------------------------------------------------------------------------------------------------------------------------------------------------------------------------------------------------------------|--------------|
| <p><i>Between 2002 and 2015, 89 drowning deaths occurred as a result of driving into floodwaters.</i></p> <p><i>Any flooded road can be deadly. Just a small amount of floodwater can wash your vehicle away.</i></p> <p><i>The second you decide to push through floodwater, you will give up control.</i></p> <p><i>The size of your vehicle doesn't matter, nor whether you've driven the road a hundred times before.</i></p> <p><i>No one can predict what lies underneath the surface. Even gently-moving floodwater can wash away the road surface beneath.</i></p> | Neutral grey |

**Part 2: Promoting Willingness to Form a Goal**

| Audio                                                                                                                                                                                                                                                                                                                                                                                                                                                                                                                                                                                                                                                                                                                                                                                                                                                                                                                                                                                                                                                                                                                                                                                                                                                                                                                            | Video                    |
|----------------------------------------------------------------------------------------------------------------------------------------------------------------------------------------------------------------------------------------------------------------------------------------------------------------------------------------------------------------------------------------------------------------------------------------------------------------------------------------------------------------------------------------------------------------------------------------------------------------------------------------------------------------------------------------------------------------------------------------------------------------------------------------------------------------------------------------------------------------------------------------------------------------------------------------------------------------------------------------------------------------------------------------------------------------------------------------------------------------------------------------------------------------------------------------------------------------------------------------------------------------------------------------------------------------------------------|--------------------------|
| <p>Driving into floodwater can affect anyone, including you. So, I would now like you to consider the potential for this to affect you.</p> <p>People are often tempted to drive into floodwater...</p> <ul style="list-style-type: none"> <li><i>To get home</i></li> <li><i>To get to work</i></li> <li><i>Because the other road takes longer</i></li> <li><i>Because they've done it before</i></li> <li><i>Because their 4wd can handle it</i></li> <li><i>Because others are driving through</i></li> <li><i>Because they think they can assess the risk and manage it</i></li> </ul> <p><i>But, it is incredibly risky.</i></p> <p>Driving into floodwaters puts you and your passengers at risk and it could be fatal.</p> <p>So, what I'd like you to consider today, is forming a goal to avoid driving into floodwater if you encounter it on your route.</p> <p>By considering the risks and thinking of a plan, you can avoid driving into floodwater. The best way to get started is to set a goal to avoid driving into any floodwater. You should aim to avoid driving into any floodwater. The mental imagery exercise will help you to achieve your goal.</p> <p>On the next page, there is a question to answer. Once you have answered the question, please proceed to the next page and play the video.</p> | Scenes from flood events |

Part 3: Practice Imagery Exercise

| Audio                                                                                                                                                                                                                                                                                                                                                                                                                                                                                                                                                                                                                                                                                                                                                                                                                                                                                                                                                                                                                                                                                                                                                                                                                                                                                                                                                                                                                                                                                                                                                                                                                                                                                                                                                                                               | Video              |
|-----------------------------------------------------------------------------------------------------------------------------------------------------------------------------------------------------------------------------------------------------------------------------------------------------------------------------------------------------------------------------------------------------------------------------------------------------------------------------------------------------------------------------------------------------------------------------------------------------------------------------------------------------------------------------------------------------------------------------------------------------------------------------------------------------------------------------------------------------------------------------------------------------------------------------------------------------------------------------------------------------------------------------------------------------------------------------------------------------------------------------------------------------------------------------------------------------------------------------------------------------------------------------------------------------------------------------------------------------------------------------------------------------------------------------------------------------------------------------------------------------------------------------------------------------------------------------------------------------------------------------------------------------------------------------------------------------------------------------------------------------------------------------------------------------|--------------------|
| <p>We will now begin a general exercise to get you used to the idea of mental imagery and how it feels.</p> <p>When doing mental imagery, people often find it useful to close their eyes.</p> <p>So now, let’s begin. The first exercise is to prepare you for the mental imagery exercise ahead. The idea is for you to just relax and visualise the images as I talk you through it.</p> <p>So, imagine this scene. You are in your kitchen. In front of you there is a chopping board and a sharp knife. On the chopping board is a large, round, ripe, bright yellow lemon. Look closely at the lemon.</p> <p>[5 second pause]</p> <p>Pick up the lemon. Feel the lightly pitted texture of the peel, the vividness of the yellow of its colour, and the strong, tangy lemon smell. You rub the lemon gently with your fingers, and that causes the smell to grow stronger. The smell transfers to your fingers as you rub it. Hold it up to the light and look at it for a moment. Notice its colour and texture.</p> <p>[5 second pause]</p> <p>Now, put the lemon back on the chopping board. Pick up the knife and imagine yourself cutting the lemon down the middle. Feel the pressure of the knife handle on your hand as you cut into the lemon. See the juice burst out of the lemon, and cascade on to the board. Smell the intensity of the smell of the lemon juice.</p> <p>[5 second pause]</p> <p>Ok, pause there. You can open your eyes, but just stay relaxed. That completes the first exercise. The idea was to get you used to imagining a scene with great intensity and to familiarise you with how to use imagery. Often imagery is quite challenging for people. The idea is to actually feel as if you are there, ‘in the moment’, and to use all of your senses.</p> | <p>Lemon image</p> |



Part 5: Outcome Mental Simulation

| Audio                                                                                                                                                                                                                                                                                                                                                                                                                                                                                                                                                                                                                                                                                                                                                                                                                                                                                                                                                                                                                                                                                                                                                                                                                                                                                                                                                                                                                                                                                                                                                                                                                                                                                                                                  | Video                                                                                                                                                                              |
|----------------------------------------------------------------------------------------------------------------------------------------------------------------------------------------------------------------------------------------------------------------------------------------------------------------------------------------------------------------------------------------------------------------------------------------------------------------------------------------------------------------------------------------------------------------------------------------------------------------------------------------------------------------------------------------------------------------------------------------------------------------------------------------------------------------------------------------------------------------------------------------------------------------------------------------------------------------------------------------------------------------------------------------------------------------------------------------------------------------------------------------------------------------------------------------------------------------------------------------------------------------------------------------------------------------------------------------------------------------------------------------------------------------------------------------------------------------------------------------------------------------------------------------------------------------------------------------------------------------------------------------------------------------------------------------------------------------------------------------|------------------------------------------------------------------------------------------------------------------------------------------------------------------------------------|
| <p>Please again make yourself comfortable and make sure that you are free from distractions. I am now going to guide you through some more imagery. Again, you may find it helpful to close your eyes.</p> <p>[5 second pause]</p> <p>Now think about the potential things that could happen if you drive into floodwater.</p> <p>[10 second pause]</p> <p>Now think about some of the outcomes if you avoid driving into floodwater. For example: It took a little bit longer, but you made it home safely.</p> <p>[10 second pause]</p> <p>Now, think about your goal to not drive into any floodwater. Now close your eyes again and imagine yourself having achieved that goal.</p> <p>[10 second pause]</p> <p>Think of all the effort you put in to achieving your goal now that you have finally accomplished it. Imagine the result of accomplishing this goal.</p> <p>[10 second pause]</p> <p>Think about all of the benefits you will gain: your safety and your passenger’s safety; not suffering the expense of wrecking your car.</p> <p>Try to feel the satisfaction you would have with this accomplishment. Imagine a typical flood event and see yourself as someone who does not drive into floodwater.</p> <p>[10 second pause]</p> <p>Now, think about your loved ones, your family, children, and friends. What will they think if you achieved your goal to not drive into any floodwater?</p> <p>[10 second pause]</p> <p>Now you have finished your imagery, using the space below, please note down a few sentences summarising the positive benefits you imagined as a result of not driving into floodwater. It should be as detailed as possible. Spend about 2-3 minutes writing down your thoughts.</p> | <p>Car at night in rain approaching floodwater</p> <p>Black</p> <p>Car at night in rain approaching floodwater</p> <p>Black</p> <p>Car at night in rain approaching floodwater</p> |

**Part 6: Conclusion**

| Audio                                                                                                                                                                                          | Video        |
|------------------------------------------------------------------------------------------------------------------------------------------------------------------------------------------------|--------------|
| <i>Thank you for your attention, and if you're ever in the situation, please remember your goal. Please now proceed to the next page which contains some more questions for you to answer.</i> | Neutral grey |

For peer review only

Supplementary Material B

Items and response scales for measurement of psychological constructs

| Behaviour                                        |                                                                                         | Definition                                                                                                                                                                                                                                                                                                                                                                                                                                                                                                                                                                                                                        |
|--------------------------------------------------|-----------------------------------------------------------------------------------------|-----------------------------------------------------------------------------------------------------------------------------------------------------------------------------------------------------------------------------------------------------------------------------------------------------------------------------------------------------------------------------------------------------------------------------------------------------------------------------------------------------------------------------------------------------------------------------------------------------------------------------------|
| Driving through floodwater <sup>a</sup>          |                                                                                         | The following questions will ask about your knowledge and attitudes towards driving through floodwater. “Floodwater” refers to a body of water covering land that is normally dry. For the next questions, please think about your driving through floodwater. For example, think about the scenario where you are driving in your car immediately after a thunderstorm. You approach a section of the road that is completely covered in water. This could be any amount of water. Now consider your future driving, if such a scenario occurred, how likely are you in the future to drive through the floodwater...?”.         |
| Avoiding driving through floodwater <sup>b</sup> |                                                                                         | The following questions will ask about your knowledge and attitudes towards driving through floodwater. “Floodwater” refers to a body of water covering land that is normally dry. For the next questions, please think about your driving through floodwater. For example, think about the scenario where you are driving in your car immediately after a thunderstorm. You approach a section of the road that is completely covered in water. This could be any amount of water. Now consider your future driving, if such a scenario occurred, how likely are you in the future to AVOID driving through the floodwater...?”. |
| Construct                                        | Items                                                                                   | Scoring                                                                                                                                                                                                                                                                                                                                                                                                                                                                                                                                                                                                                           |
| Intention <sup>a</sup>                           | I intend to drive through the floodwater.                                               | [1] extremely unlikely – [7] extremely likely                                                                                                                                                                                                                                                                                                                                                                                                                                                                                                                                                                                     |
|                                                  | I expect I would drive through the floodwater.                                          |                                                                                                                                                                                                                                                                                                                                                                                                                                                                                                                                                                                                                                   |
|                                                  | It is likely that I will drive through the floodwater.                                  |                                                                                                                                                                                                                                                                                                                                                                                                                                                                                                                                                                                                                                   |
|                                                  | In general, I would be willing to drive through the floodwater.                         |                                                                                                                                                                                                                                                                                                                                                                                                                                                                                                                                                                                                                                   |
| Attitudes <sup>a</sup>                           | If I were to drive through the floodwater, it would be...                               | [1] bad – [7] good                                                                                                                                                                                                                                                                                                                                                                                                                                                                                                                                                                                                                |
|                                                  |                                                                                         | [1] harmful – [7] harmless                                                                                                                                                                                                                                                                                                                                                                                                                                                                                                                                                                                                        |
|                                                  |                                                                                         | [1] unwise – [7] wise                                                                                                                                                                                                                                                                                                                                                                                                                                                                                                                                                                                                             |
|                                                  |                                                                                         | [1] intelligent – [7] stupid                                                                                                                                                                                                                                                                                                                                                                                                                                                                                                                                                                                                      |
|                                                  |                                                                                         | [1] negative – [7] positive                                                                                                                                                                                                                                                                                                                                                                                                                                                                                                                                                                                                       |
| Subjective Norm <sup>a</sup>                     | Most people who are important to me would approve of me driving through the floodwater. | [1] strongly disagree – [7] strongly agree                                                                                                                                                                                                                                                                                                                                                                                                                                                                                                                                                                                        |
|                                                  | Those people who are important to me think that I should drive through the floodwater.  |                                                                                                                                                                                                                                                                                                                                                                                                                                                                                                                                                                                                                                   |
|                                                  | Those people who are important to me would want me to drive through the floodwater.     |                                                                                                                                                                                                                                                                                                                                                                                                                                                                                                                                                                                                                                   |

|                                            |                                                                                                                 |                                                         |
|--------------------------------------------|-----------------------------------------------------------------------------------------------------------------|---------------------------------------------------------|
|                                            | Those people who are similar to me would drive through the floodwater.                                          |                                                         |
|                                            | Most people like me would drive through the floodwater.                                                         |                                                         |
| Perceived Behavioural Control <sup>a</sup> | It is mostly up to me whether I drive through the floodwater.                                                   | [1] strongly disagree – [7] strongly agree              |
|                                            | I have complete control over whether I drive through the floodwater.                                            |                                                         |
|                                            | It would be easy for me to drive through the floodwater.                                                        |                                                         |
|                                            | I am confident I could drive through the floodwater.                                                            |                                                         |
| Risk perception <sup>a</sup>               | It would be risky for me to drive through the floodwater.                                                       | [1] strongly disagree – [7] strongly agree              |
|                                            | If I drive through the floodwater there would be risk involved.                                                 |                                                         |
| Perceived susceptibility <sup>a</sup>      | My chances of having trouble if I drive through the floodwater are great.                                       | [1] extremely unsusceptible – [7] extremely susceptible |
|                                            | There is a good possibility that I will have trouble if I drive through the floodwater.                         |                                                         |
|                                            | I would be worried about having trouble if I drove through the floodwater.                                      |                                                         |
| Perceived severity <sup>a</sup>            | If I drive through the floodwater, the consequences would be...?                                                | [1] not at all severe – [7] extremely severe            |
|                                            | If you drive through the floodwater, to what extent would it impact severely on your life?                      |                                                         |
| Anticipated regret <sup>a</sup>            | If I were to drive through the floodwater, I would feel regret.                                                 | [1] strongly disagree – [7] strongly agree              |
|                                            | If I were to drive through the floodwater, I would feel sorry for doing it.                                     |                                                         |
|                                            | I would feel upset if I drove through the floodwater.                                                           |                                                         |
| Barrier self-efficacy <sup>b</sup>         | I am confident I can avoid driving through floodwaters in the future...?                                        | [1] not at all confident – [7] definitely confident     |
|                                            | ... even when I might be late for work                                                                          |                                                         |
|                                            | ... even when I need to get to my children/other family members                                                 |                                                         |
|                                            | ... even when I need to get home to check on the house/pets etc                                                 |                                                         |
|                                            | ... even when the alternative route will take more time/is inconvenient                                         |                                                         |
|                                            | ... even when I see others driving through                                                                      |                                                         |
|                                            | ... even when I think I can make it                                                                             |                                                         |
|                                            | ... even when I feel pressure from others to drive through                                                      |                                                         |
|                                            | ... even when I know others are around to help if something goes wrong                                          |                                                         |
|                                            | ... even when I think my vehicle is capable to drive through                                                    |                                                         |
| Action planning <sup>b</sup>               | Do you have a plan with regard to AVOIDING driving through floodwater next time you encounter it on your route? | [1] not at all true – [7] exactly true                  |
|                                            | When to avoid driving through floodwater                                                                        |                                                         |
|                                            | Where to avoid driving through floodwater                                                                       |                                                         |
|                                            | How to avoid driving through floodwater                                                                         |                                                         |
|                                            | How often to avoid driving through floodwater                                                                   |                                                         |

1  
2  
3  
4  
5  
6  
7  
8  
9  
10  
11  
12  
13  
14  
15  
16  
17  
18  
19  
20  
21  
22  
23  
24  
25  
26  
27  
28  
29  
30  
31  
32  
33  
34  
35  
36  
37  
38  
39  
40  
41  
42  
43  
44  
45  
46

|                               |                                                                                                                                                                                                         |                                              |
|-------------------------------|---------------------------------------------------------------------------------------------------------------------------------------------------------------------------------------------------------|----------------------------------------------|
| Imagery ability <sup>c</sup>  | Typically, I...                                                                                                                                                                                         | [1] very inaccurate – [5] very accurate      |
|                               | Have a rich vocabulary                                                                                                                                                                                  |                                              |
|                               | Have difficulty understanding abstract ideas                                                                                                                                                            |                                              |
|                               | Have a vivid imagination                                                                                                                                                                                |                                              |
|                               | Am not interested in abstract ideas                                                                                                                                                                     |                                              |
|                               | Have excellent ideas                                                                                                                                                                                    |                                              |
|                               | Do not have a good imagination                                                                                                                                                                          |                                              |
|                               | Am quick to understand things                                                                                                                                                                           |                                              |
|                               | Use difficult words                                                                                                                                                                                     |                                              |
|                               | Spend time reflecting on things                                                                                                                                                                         |                                              |
|                               | Am full of ideas                                                                                                                                                                                        |                                              |
| Goal intention <sup>c</sup>   | Now that you have heard some information about driving into floodwater, please indicate your agreement with the following statement:<br>I am willing to form a goal to avoid driving through floodwater | [1] strongly disagree – [7] strongly agree   |
| Imagery fidelity <sup>d</sup> | Vividness: How VIVID was the mental image that you had of yourself avoiding driving through the floodwater?                                                                                             | [1] not at all vivid – [7] very vivid        |
|                               | Clarity: How CLEAR was the mental image that you had of yourself avoiding driving through the floodwater?                                                                                               | [1] not at all clear – [7] very clear        |
|                               | Detail: How DETAILED were the images that you had of yourself avoiding driving through the floodwater?                                                                                                  | [1] not at all detailed – [7] very detailed  |
|                               | Ease: How easy or difficult was it for you to create these images?                                                                                                                                      | [1] extremely easy – [7] extremely difficult |

Note: <sup>c</sup>covariate; <sup>d</sup>intervention group only

## Supplementary Material C – Informed Consent Materials



### Investigating Driver Behaviour During Floods

#### INFORMATION SHEET

|                                                                                                                                                                                   |                                                                                                                                                                                                                                                    |
|-----------------------------------------------------------------------------------------------------------------------------------------------------------------------------------|----------------------------------------------------------------------------------------------------------------------------------------------------------------------------------------------------------------------------------------------------|
| <b>Chief Investigator</b><br>Dr Kyra Hamilton, Senior Lecturer<br>School of Applied Psychology, Griffith University<br>Ph: (07) 3735 3334<br>Email: kyra.hamilton@griffith.edu.au | <b>Co-Investigator</b><br>Mr Jacob Keech, PhD Candidate<br>School of Applied Psychology, Griffith University<br>Ph: (07) 3735 3383<br>Email: j.keeche@griffith.edu.au                                                                              |
| <b>Co- Investigator</b><br>Ms Amy Peden, National Manager– Research and Policy<br>Royal Life Saving Society – Australia<br>Ph: (02) 8217 3133<br>Email: apeden@rlssa.org.au       | <b>Co- Investigator</b><br>Prof Martin Hagger, John Curtin Distinguished Professor<br>Health Psychology and Behavioural Medicine Research Group School of Psychology and Speech Pathology, Curtin University<br>Email: martin.hagger@curtin.edu.au |

#### Why is the research being conducted?

The aim of the current study is to develop an understanding of driver behaviour during floods. The research team requests your assistance in helping us with this research.

#### What you will be asked to do

Your participation in this project will involve completing a brief online survey that will ask questions about your knowledge and attitudes toward driving through floodwater. You will also be asked to provide some background demographic details. This information is not used to identify you in any way but rather it will tell us about the representation of the individuals participating in the study. In addition, you will be required to watch videos and then fill in another online survey. The study will take approximately 35 minutes to complete. One week and four weeks after completing these tasks we will contact you by email and ask you to complete another short questionnaire, which will take approximately 15 minutes. These videos will require sound and you will need to be in a place that is quiet and free from distractions. You may prefer to use headphones to reduce distractions from background noise. The survey has been optimised for computer delivery and may not work properly on smartphones.

#### Participant selection and/or screening

We welcome your participation if you have are an Australian resident with a registered driver's licence.

#### The expected benefits of the research

It is expected that this project will not directly benefit you. However, your involvement will provide valuable information about decisions regarding driving through floodwater and, therefore, may benefit others through a greater understanding of these processes.

#### Risks to you

It is unlikely that there are any risks greater than daily living involved with participation in this project. However, should you experience any discomfort due to undertaking this survey, Lifeline (13 11 14) offers a free 24 hour telephone counselling service.

#### Your participation is voluntary

Your participation in this project is completely voluntary and you may cease participation at any time. If you agree to participate, you can withdraw from participation at any time during the project without comment or penalty. However, once your responses have been submitted and we have de-identified them, you will be unable to withdraw. Your decision to participate will in no way impact upon your current or future relationship with Griffith University.

**Your confidentiality**

The information you provide will be treated confidentially and all comments and responses are anonymous. Please do not put your name on the questionnaire. Your responses to the questionnaire will form part of a large data response set, which will initially be stored by Qualtrics. Research data from Qualtrics will be downloaded and stored securely on Griffith University's Google Drive or OneDrive allocation. Data will be password-protected and accessible only to members of the research team. As required by Griffith University, all research data (survey responses and analysis) will be retained in a password-protected electronic file for a minimum period of five years before being destroyed. Participants will be given the opportunity separately to express consent to be contacted for the follow-up survey. These contact details will be deleted following conclusion of the follow-up survey. A personal code identifier will be used to match surveys. Participants' data will not be identifiable in any publication or reporting. In the interest of researcher transparency, a strictly de-identified version of the research data will be prepared and made available on the online open data repository Open Science Framework (<https://osf.io/>).

**Consent to participate**

Completion and submission of the survey will be accepted as informed consent to participate.

**Questions / further information about the project**

Please contact the research team members if you have any questions or require further information about the project.

**Feedback to you**

No automatic feedback will be given to you about the results of this study. However, if you participate and wish to receive a summary of the research results once the study has been completed, you can email the research team members.

**The ethical conduct of project**

Griffith University conducts research in accordance with the *National Statement on Ethical Conduct in Human Research*. If you do have any concerns or complaints about the ethical conduct of the project you may contact the Manager, Research Ethics on (07) 3735 4375 or [research-ethics@griffith.edu.au](mailto:research-ethics@griffith.edu.au). This project has received ethical approval from the Griffith University Human Research Ethics Committee (GU Ref no: 2017/895).

# Reporting checklist for protocol of a clinical trial.

Based on the SPIRIT guidelines.

## Instructions to authors

Complete this checklist by entering the page numbers from your manuscript where readers will find each of the items listed below.

Your article may not currently address all the items on the checklist. Please modify your text to include the missing information. If you are certain that an item does not apply, please write "n/a" and provide a short explanation.

Upload your completed checklist as an extra file when you submit to a journal.

In your methods section, say that you used the SPIRIT reporting guidelines, and cite them as:

Chan A-W, Tetzlaff JM, Altman DG, Laupacis A, Gøtzsche PC, Krleža-Jerić K, Hróbjartsson A, Mann H, Dickersin K, Berlin J, Doré C, Parulekar W, Summerskill W, Groves T, Schulz K, Sox H, Rockhold FW, Rennie D, Moher D. SPIRIT 2013 Statement: Defining standard protocol items for clinical trials. *Ann Intern Med.* 2013;158(3):200-207

|                                             |     | Reporting Item                                                                                               | Page Number |
|---------------------------------------------|-----|--------------------------------------------------------------------------------------------------------------|-------------|
| Title                                       | #1  | Descriptive title identifying the study design, population, interventions, and, if applicable, trial acronym | 1           |
| Trial registration                          | #2a | Trial identifier and registry name. If not yet registered, name of intended registry                         | 2           |
| Trial registration: data set                | #2b | All items from the World Health Organization Trial Registration Data Set                                     | N/A         |
| Protocol version                            | #3  | Date and version identifier                                                                                  | N/A         |
| Funding                                     | #4  | Sources and types of financial, material, and other support                                                  | 22          |
| Roles and responsibilities: contributorship | #5a | Names, affiliations, and roles of protocol contributors                                                      | 22          |
| Roles and responsibilities:                 | #5b | Name and contact information for the trial sponsor                                                           | 22          |

|    |                      |      |                                                                   |      |
|----|----------------------|------|-------------------------------------------------------------------|------|
| 1  | sponsor contact      |      |                                                                   |      |
| 2  | information          |      |                                                                   |      |
| 3  |                      |      |                                                                   |      |
| 4  | Roles and            | #5c  | Role of study sponsor and funders, if any, in study design;       | 22   |
| 5  | responsibilities:    |      | collection, management, analysis, and interpretation of           |      |
| 6  | sponsor and funder   |      | data; writing of the report; and the decision to submit the       |      |
| 7  |                      |      | report for publication, including whether they will have          |      |
| 8  |                      |      | ultimate authority over any of these activities                   |      |
| 9  |                      |      |                                                                   |      |
| 10 |                      |      |                                                                   |      |
| 11 |                      |      |                                                                   |      |
| 12 | Roles and            | #5d  | Composition, roles, and responsibilities of the coordinating      | N/A  |
| 13 | responsibilities:    |      | centre, steering committee, endpoint adjudication                 |      |
| 14 | committees           |      | committee, data management team, and other individuals or         |      |
| 15 |                      |      | groups overseeing the trial, if applicable (see Item 21a for      |      |
| 16 |                      |      | data monitoring committee)                                        |      |
| 17 |                      |      |                                                                   |      |
| 18 |                      |      |                                                                   |      |
| 19 |                      |      |                                                                   |      |
| 20 | Background and       | #6a  | Description of research question and justification for            | 3-6  |
| 21 | rationale            |      | undertaking the trial, including summary of relevant studies      |      |
| 22 |                      |      | (published and unpublished) examining benefits and harms          |      |
| 23 |                      |      | for each intervention                                             |      |
| 24 |                      |      |                                                                   |      |
| 25 |                      |      |                                                                   |      |
| 26 |                      |      |                                                                   |      |
| 27 | Background and       | #6b  | Explanation for choice of comparators                             | 10   |
| 28 | rationale: choice of |      |                                                                   |      |
| 29 | comparators          |      |                                                                   |      |
| 30 |                      |      |                                                                   |      |
| 31 |                      |      |                                                                   |      |
| 32 | Objectives           | #7   | Specific objectives or hypotheses                                 | 5-6  |
| 33 |                      |      |                                                                   |      |
| 34 |                      |      |                                                                   |      |
| 35 | Trial design         | #8   | Description of trial design including type of trial (eg, parallel | 7    |
| 36 |                      |      | group, crossover, factorial, single group), allocation ratio,     |      |
| 37 |                      |      | and framework (eg, superiority, equivalence, non-inferiority,     |      |
| 38 |                      |      | exploratory)                                                      |      |
| 39 |                      |      |                                                                   |      |
| 40 |                      |      |                                                                   |      |
| 41 |                      |      |                                                                   |      |
| 42 | Study setting        | #9   | Description of study settings (eg, community clinic,              | 7    |
| 43 |                      |      | academic hospital) and list of countries where data will be       |      |
| 44 |                      |      | collected. Reference to where list of study sites can be          |      |
| 45 |                      |      | obtained                                                          |      |
| 46 |                      |      |                                                                   |      |
| 47 |                      |      |                                                                   |      |
| 48 |                      |      |                                                                   |      |
| 49 | Eligibility criteria | #10  | Inclusion and exclusion criteria for participants. If applicable, | 7-8  |
| 50 |                      |      | eligibility criteria for study centres and individuals who will   |      |
| 51 |                      |      | perform the interventions (eg, surgeons, psychotherapists)        |      |
| 52 |                      |      |                                                                   |      |
| 53 |                      |      |                                                                   |      |
| 54 | Interventions:       | #11a | Interventions for each group with sufficient detail to allow      | 8-10 |
| 55 | description          |      | replication, including how and when they will be                  |      |
| 56 |                      |      | administered                                                      |      |
| 57 |                      |      |                                                                   |      |
| 58 |                      |      |                                                                   |      |
| 59 |                      |      |                                                                   |      |
| 60 |                      |      |                                                                   |      |

|                                 |      |                                                                                                                                                                                                                                                                                                                                                                                |          |
|---------------------------------|------|--------------------------------------------------------------------------------------------------------------------------------------------------------------------------------------------------------------------------------------------------------------------------------------------------------------------------------------------------------------------------------|----------|
| Interventions: modifications    | #11b | Criteria for discontinuing or modifying allocated interventions for a given trial participant (eg, drug dose change in response to harms, participant request, or improving / worsening disease)                                                                                                                                                                               | N/A      |
| Interventions: adherence        | #11c | Strategies to improve adherence to intervention protocols, and any procedures for monitoring adherence (eg, drug tablet return; laboratory tests)                                                                                                                                                                                                                              | 8        |
| Interventions: concomitant care | #11d | Relevant concomitant care and interventions that are permitted or prohibited during the trial                                                                                                                                                                                                                                                                                  | N/A      |
| Outcomes                        | #12  | Primary, secondary, and other outcomes, including the specific measurement variable (eg, systolic blood pressure), analysis metric (eg, change from baseline, final value, time to event), method of aggregation (eg, median, proportion), and time point for each outcome. Explanation of the clinical relevance of chosen efficacy and harm outcomes is strongly recommended | 10-13    |
| Participant timeline            | #13  | Time schedule of enrolment, interventions (including any run-ins and washouts), assessments, and visits for participants. A schematic diagram is highly recommended (see Figure)                                                                                                                                                                                               | Figure 1 |
| Sample size                     | #14  | Estimated number of participants needed to achieve study objectives and how it was determined, including clinical and statistical assumptions supporting any sample size calculations                                                                                                                                                                                          | 13       |
| Recruitment                     | #15  | Strategies for achieving adequate participant enrolment to reach target sample size                                                                                                                                                                                                                                                                                            | 7-8      |
| Allocation: sequence generation | #16a | Method of generating the allocation sequence (eg, computer-generated random numbers), and list of any factors for stratification. To reduce predictability of a random sequence, details of any planned restriction (eg, blocking) should be provided in a separate document that is unavailable to those who enrol participants or assign interventions                       | 8        |
| Allocation concealment          | #16b | Mechanism of implementing the allocation sequence (eg, central telephone; sequentially numbered, opaque, sealed                                                                                                                                                                                                                                                                | 8        |

|                                                  |      |                                                                                                                                                                                                                                                                                                                                                                                                              |       |
|--------------------------------------------------|------|--------------------------------------------------------------------------------------------------------------------------------------------------------------------------------------------------------------------------------------------------------------------------------------------------------------------------------------------------------------------------------------------------------------|-------|
| mechanism                                        |      | envelopes), describing any steps to conceal the sequence until interventions are assigned                                                                                                                                                                                                                                                                                                                    |       |
| Allocation: implementation                       | #16c | Who will generate the allocation sequence, who will enrol participants, and who will assign participants to interventions                                                                                                                                                                                                                                                                                    | 8     |
| Blinding (masking)                               | #17a | Who will be blinded after assignment to interventions (eg, trial participants, care providers, outcome assessors, data analysts), and how                                                                                                                                                                                                                                                                    | 7-8   |
| Blinding (masking): emergency unblinding         | #17b | If blinded, circumstances under which unblinding is permissible, and procedure for revealing a participant's allocated intervention during the trial                                                                                                                                                                                                                                                         | N/A   |
| Data collection plan                             | #18a | Plans for assessment and collection of outcome, baseline, and other trial data, including any related processes to promote data quality (eg, duplicate measurements, training of assessors) and a description of study instruments (eg, questionnaires, laboratory tests) along with their reliability and validity, if known. Reference to where data collection forms can be found, if not in the protocol | 7-8   |
| Data collection plan: retention                  | #18b | Plans to promote participant retention and complete follow-up, including list of any outcome data to be collected for participants who discontinue or deviate from intervention protocols                                                                                                                                                                                                                    | 8     |
| Data management                                  | #19  | Plans for data entry, coding, security, and storage, including any related processes to promote data quality (eg, double data entry; range checks for data values). Reference to where details of data management procedures can be found, if not in the protocol                                                                                                                                            | 15-16 |
| Statistics: outcomes                             | #20a | Statistical methods for analysing primary and secondary outcomes. Reference to where other details of the statistical analysis plan can be found, if not in the protocol                                                                                                                                                                                                                                     | 14    |
| Statistics: additional analyses                  | #20b | Methods for any additional analyses (eg, subgroup and adjusted analyses)                                                                                                                                                                                                                                                                                                                                     | N/A   |
| Statistics: analysis population and missing data | #20c | Definition of analysis population relating to protocol non-adherence (eg, as randomised analysis), and any statistical methods to handle missing data (eg, multiple imputation)                                                                                                                                                                                                                              | 14    |

|                                               |      |                                                                                                                                                                                                                                                                                                                                                      |       |
|-----------------------------------------------|------|------------------------------------------------------------------------------------------------------------------------------------------------------------------------------------------------------------------------------------------------------------------------------------------------------------------------------------------------------|-------|
| 1 Data monitoring:<br>2 formal committee      | #21a | Composition of data monitoring committee (DMC); summary<br>of its role and reporting structure; statement of whether it is<br>independent from the sponsor and competing interests; and<br>reference to where further details about its charter can be<br>found, if not in the protocol. Alternatively, an explanation of<br>why a DMC is not needed | 16    |
| 11 Data monitoring:<br>12 interim analysis    | #21b | Description of any interim analyses and stopping guidelines,<br>including who will have access to these interim results and<br>make the final decision to terminate the trial                                                                                                                                                                        | 14    |
| 16 Harms                                      | #22  | Plans for collecting, assessing, reporting, and managing<br>solicited and spontaneously reported adverse events and<br>other unintended effects of trial interventions or trial conduct                                                                                                                                                              | 15    |
| 21 Auditing                                   | #23  | Frequency and procedures for auditing trial conduct, if any,<br>and whether the process will be independent from<br>investigators and the sponsor                                                                                                                                                                                                    | N/A   |
| 27 Research ethics<br>28 approval             | #24  | Plans for seeking research ethics committee / institutional<br>review board (REC / IRB) approval                                                                                                                                                                                                                                                     | 15    |
| 31 Protocol<br>32 amendments                  | #25  | Plans for communicating important protocol modifications<br>(eg, changes to eligibility criteria, outcomes, analyses) to<br>relevant parties (eg, investigators, REC / IRBs, trial<br>participants, trial registries, journals, regulators)                                                                                                          | 15    |
| 37 Consent or assent                          | #26a | Who will obtain informed consent or assent from potential<br>trial participants or authorised surrogates, and how (see<br>Item 32)                                                                                                                                                                                                                   | 15    |
| 43 Consent or assent:<br>44 ancillary studies | #26b | Additional consent provisions for collection and use of<br>participant data and biological specimens in ancillary<br>studies, if applicable                                                                                                                                                                                                          | N/A   |
| 48 Confidentiality                            | #27  | How personal information about potential and enrolled<br>participants will be collected, shared, and maintained in<br>order to protect confidentiality before, during, and after the<br>trial                                                                                                                                                        | 15    |
| 55 Declaration of<br>56 interests             | #28  | Financial and other competing interests for principal<br>investigators for the overall trial and each study site                                                                                                                                                                                                                                     | 22    |
| 58 Data access                                | #29  | Statement of who will have access to the final trial dataset,                                                                                                                                                                                                                                                                                        | 15-16 |

|    |                       |      |                                                                 |         |
|----|-----------------------|------|-----------------------------------------------------------------|---------|
| 1  |                       |      | and disclosure of contractual agreements that limit such        |         |
| 2  |                       |      | access for investigators                                        |         |
| 3  |                       |      |                                                                 |         |
| 4  | Ancillary and post    | #30  | Provisions, if any, for ancillary and post-trial care, and for  | 15      |
| 5  | trial care            |      | compensation to those who suffer harm from trial                |         |
| 6  |                       |      | participation                                                   |         |
| 7  |                       |      |                                                                 |         |
| 8  |                       |      |                                                                 |         |
| 9  | Dissemination policy: | #31a | Plans for investigators and sponsor to communicate trial        | 16      |
| 10 | trial results         |      | results to participants, healthcare professionals, the public,  |         |
| 11 |                       |      | and other relevant groups (eg, via publication, reporting in    |         |
| 12 |                       |      | results databases, or other data sharing arrangements),         |         |
| 13 |                       |      | including any publication restrictions                          |         |
| 14 |                       |      |                                                                 |         |
| 15 |                       |      |                                                                 |         |
| 16 |                       |      |                                                                 |         |
| 17 | Dissemination policy: | #31b | Authorship eligibility guidelines and any intended use of       | 16      |
| 18 | authorship            |      | professional writers                                            |         |
| 19 |                       |      |                                                                 |         |
| 20 |                       |      |                                                                 |         |
| 21 | Dissemination policy: | #31c | Plans, if any, for granting public access to the full protocol, | 16 & 22 |
| 22 | reproducible          |      | participant-level dataset, and statistical code                 |         |
| 23 | research              |      |                                                                 |         |
| 24 |                       |      |                                                                 |         |
| 25 |                       |      |                                                                 |         |
| 26 |                       |      |                                                                 |         |
| 27 | Informed consent      | #32  | Model consent form and other related documentation given        | Supp C  |
| 28 | materials             |      | to participants and authorised surrogates                       |         |
| 29 |                       |      |                                                                 |         |
| 30 |                       |      |                                                                 |         |
| 31 | Biological specimens  | #33  | Plans for collection, laboratory evaluation, and storage of     | N/A     |
| 32 |                       |      | biological specimens for genetic or molecular analysis in the   |         |
| 33 |                       |      | current trial and for future use in ancillary studies, if       |         |
| 34 |                       |      | applicable                                                      |         |
| 35 |                       |      |                                                                 |         |
| 36 |                       |      |                                                                 |         |

37 The SPIRIT checklist is distributed under the terms of the Creative Commons Attribution License CC-  
38 BY-ND 3.0. This checklist was completed on 20. July 2018 using <http://www.goodreports.org/>, a tool  
39 made by the [EQUATOR Network](#) in collaboration with [Penelope.ai](#)  
40  
41  
42  
43  
44  
45  
46  
47  
48  
49  
50  
51  
52  
53  
54  
55  
56  
57  
58  
59  
60
